## Tuning antiviral CD8 T-cell response via proline-altered peptide ligand vaccination

**Authors:** Adil Doganay Duru<sup>1,2,¶</sup>, Renhua Sun<sup>1,¶</sup>, Eva B. Allerbring<sup>1,¶</sup>, Jesseka Chadderton<sup>3</sup>, Nadir Kadri<sup>1</sup>, Xiao Han<sup>1</sup>, Hannes Uchtenhagen<sup>1</sup>, Chaithanya Madhurantakam<sup>1</sup>, Sara Pellegrino<sup>4</sup>, Tatyana Sandalova<sup>1</sup>, Per-Åke Nygren<sup>5</sup>, Stephen J. Turner<sup>3</sup> and Adnane Achour<sup>1,\*</sup>

<sup>1</sup> Science for Life Laboratory, Department of Medicine Solna, Karolinska Institute, and Division of Infectious Diseases, Karolinska University Hospital, Solna, Stockholm, Sweden,

<sup>2</sup> NSU Cell Therapy Institute & Dr. Kiran C. Patel College of Allopathic Medicine, Nova Southeastern University, Fort Lauderdale, FL, USA

<sup>3</sup> Department of Microbiology, Biomedical Discovery Institute, Monash University, Clayton, Australia.

<sup>4</sup> DISFARM, Dipartimento di Scienze Farmaceutiche, Sezinone Chimica Generale e Organica, Università degli Studi, Milano, Italy.

<sup>5</sup> Division of Protein Engineering, Department of Protein Science, School of Engineering Sciences in Chemistry, Biotechnology and Health, AlbaNova University Center, Royal Institute of Technology, Stockholm, Sweden.

\*Corresponding author

E-mail: [adnane.achour@ki.se](mailto:adnane.achour@ki.se) (AA)

¶These authors contributed equally to this work.

## 1 **Key Words**

2 LCMV, CD8 T cells, Altered Peptide Ligands, TCR, MHC class I, vaccination, immune escape,  
3 X-ray crystallography

## 5 **Abstract**

6 Viral escape from CD8<sup>+</sup> cytotoxic T lymphocyte responses correlates with disease progression and  
7 represents a significant challenge for vaccination. Here, we demonstrate that CD8<sup>+</sup> T cell  
8 recognition of the naturally occurring MHC-I-restricted LCMV-associated immune escape variant  
9 Y4F is restored following vaccination with a proline-altered peptide ligand (APL). The APL  
10 increases MHC/peptide (pMHC) complex stability, rigidifies the peptide and facilitates T cell  
11 receptor (TCR) recognition through reduced entropy costs. Structural analyses of pMHC  
12 complexes before and after TCR binding, combined with biophysical analyses, revealed that  
13 although the TCR binds similarly to all complexes, the p3P modification alters the conformations  
14 of a very limited amount of specific MHC and peptide residues, facilitating efficient TCR  
15 recognition. This approach can be easily introduced in peptides restricted to other MHC alleles,  
16 and can be combined with currently available and future vaccination protocols in order to prevent  
17 viral immune escape.

## 19 **Author Summary**

20 Viral escape mutagenesis correlates often with disease progression and represents a major hurdle  
21 for vaccination-based therapies. Here, we have designed and developed a novel generation of  
22 altered epitopes that re-establish and enhance significantly CD8<sup>+</sup> T cell recognition of a naturally  
23 occurring viral immune escape variant. Biophysical and structural analyses provide a clear

24 understanding of the molecular mechanisms underlying this reestablished recognition. We  
25 believe that this approach can be implemented to currently available or novel vaccination  
26 approaches to efficiently restore T cell recognition of virus escape variants to control disease  
27 progression.

28

## 29 **Abbreviations**

|    |                                                            |       |
|----|------------------------------------------------------------|-------|
| 30 | altered peptide ligand                                     | APL   |
| 31 | bronchoalveolar lavage                                     | BAL   |
| 32 | circular dichroism                                         | CD    |
| 33 | cytotoxic T-lymphocyte                                     | CTL   |
| 34 | isothermal titration calorimetry                           | ITC   |
| 35 | lymphocytic choriomeningitis virus                         | LCMV  |
| 36 | major histocompatibility complex class I                   | MHC-I |
| 37 | peptide/MHC complex                                        | pMHC  |
| 38 | surface plasmon resonance                                  | SPR   |
| 39 | T-cell receptor                                            | TCR   |
| 40 | T cell epitope associated with impaired peptide processing | TEIPP |

41

## 42 **Introduction**

43 Recognition of major histocompatibility complex class I (MHC-I)-restricted viral peptides is a  
44 prerequisite for CD8<sup>+</sup> T-cell activation, control and/or clearance of viral infections. Usually,  
45 cytotoxic T-lymphocyte (CTL) responses are directed towards a limited number of  
46 immunodominant viral peptides [1] and selection pressure imposed by adaptive immune responses  
47 leads often to the emergence of viral populations with a limited number of recurring escape  
48 mutations [2-4]. Epitope mutations can impair CTL responses [5] by *e.g.* altering antigen  
49 processing [6, 7], reducing the overall stability of peptide/MHC complexes (pMHC) [8, 9] and/or  
50 disrupting T-cell receptor (TCR) recognition [10, 11]. CTL escape variants correlate with disease  
51 progression [12, 13] and represent a major hurdle for disease control as well as for the design of  
52 T-cell based vaccines [14].

53  
54 To our knowledge, previous use of wild-type and escape epitopes in vaccination experiments has  
55 not provided efficient CTL responses against MHC-restricted viral escape variants [14, 15].  
56 Therefore, the design of altered peptide ligands (APLs) that could promote such responses would  
57 represent a crucial step towards the development of efficient vaccines [16]. Although our  
58 understanding of the interactions between TCRs and pMHC has increased dramatically, the impact  
59 of individual peptide modifications on TCR recognition remains difficult to predict. Even subtle  
60 peptide alterations can significantly impact on pMHC stability, and impair or abolish T cell  
61 recognition. A conventional and sometimes successful approach to design APLs with enhanced  
62 pMHC stability and immunogenicity has been to optimize interactions between peptide anchor  
63 residues and MHC binding pockets [17-19]. However, escape variants that target TCR recognition  
64 often exhibit optimal MHC anchor residues, reducing possibilities for such modifications.

65 Optimally, the introduced modifications should also not alter the conformation of APLs compared  
66 to the original epitopes, in order to elicit efficient cross-reactive CTL responses towards the wild-  
67 type epitope [18, 20, 21]. Therefore, the design of a novel generation of APLs that could promote  
68 such responses would represent a crucial step towards the development of efficient anti-viral T-  
69 cell based vaccines [22].

70

71 We have previously demonstrated that the immunogenicity of the cancer-associated H-2D<sup>b</sup>-  
72 restricted antigen gp100<sub>25-33</sub> [23] or the T cell epitope associated with impaired peptide processing  
73 (TEIPP) neo-epitope Thr4 [24-26] was dramatically improved following substitution of peptide  
74 position 3 to a proline (p3P). Comparative structural analyses revealed that the conformation of  
75 the APLs was similar to wild-type epitopes, and that the stabilizing effect of p3P is accounted for  
76 by van der Waals and CH- $\pi$  interactions with the H-2D<sup>b</sup> residue Y159, conserved among most  
77 known mouse and human MHC-I alleles, resulting in rigidification of the pMHC complex [27].  
78 Importantly, vaccination with p3P-modified APLs elicited high frequencies of CTLs from the  
79 endogenous repertoire that efficiently targeted H-2D<sup>b</sup>/gp100<sub>25-33</sub> and H-2D<sup>b</sup>/Trh4 complexes on  
80 melanoma cells [23, 24].

81

82 In the present study, we addressed if we could restore endogenous T cell recognition of a naturally  
83 occurring viral escape variant following vaccination with a p3P-modified APL. It is well established  
84 that infection of C57/Bl6 mice with LCMV induces robust CTL responses towards the  
85 immunodominant H-2D<sup>b</sup>-restricted epitope gp33 (KAVYYNFATM) [28]. Upon CTL pressure, a  
86 limited number of mutations in gp33 emerge, with consistent patterns, allowing for viral CD8<sup>+</sup> T-  
87 cell escape [2, 4, 29, 30]. The main naturally occurring mutation that allows LCMV to efficiently

88 escape immune recognition, is the Y4F substitution (KAVFNFATM) which abrogates endogenous  
89 CD8<sup>+</sup> T cell recognition as well as recognition by the H-2D<sup>b</sup>/gp33-specific TCR P14. Here, we  
90 demonstrate that peptide vaccination with PF (KAPFNFATM) restores P14 recognition of Y4F in  
91 LCMV-infected mice. Furthermore, vaccination with influenza constructs that encode for PF  
92 provokes significant endogenous CD8<sup>+</sup> T cell cross-recognition of Y4F. Comparison of crystal  
93 structures of an ensemble of pMHC complexes before and after binding to the TCR P14 revealed that  
94 i) P14 binds nearly identically to all complexes, ii) the conformations of peptide residues p1K and  
95 p6F as well as H-2D<sup>b</sup> residues R62, E163 and H155 are affected by the p3P modification,  
96 predisposing pMHC complexes for enhanced TCR recognition. The p3P modification also decreases  
97 the entropic penalty for TCR recognition. In conclusion, our results demonstrate the possibility to  
98 vaccinate with modified peptides and/or proteins for enhanced T cell recognition, and may form an  
99 alternative basis for novel strategies to target viral escape mutants.

100

101

## 102 **Results**

103

### 104 **The p3P modification enhances pMHC stability without altering structural conformation,** 105 **restoring P14 TCR recognition**

106 Circular dichroism (CD) measurements revealed a consistent increase in pMHC complex thermal  
107 stability for the p3P-substituted peptides V3P (KAPYNFATM) and PF (KAPFNFATM) compared  
108 to the wildtype gp33 (KAVYNFATM) and escape variant Y4F (KAVFNFATM) epitopes,  
109 respectively (Fig. 1A, Table 1). Importantly, the H-2D<sup>b</sup>/gp33 and H-2D<sup>b</sup>/Y4F display equivalent  
110 thermal stability (Fig. 1A). Furthermore, surface plasmon resonance (SPR) analyses revealed  
111 significantly higher binding affinity of soluble P14 TCR to H-2D<sup>b</sup>/V3P and H-2D<sup>b</sup>/PF compared  
112 to H-2D<sup>b</sup>/gp33 and H-2D<sup>b</sup>/Y4F, respectively (Fig. 1B, Table 1). In contrast to an undetectable  
113 affinity to H-2D<sup>b</sup>/Y4F, P14 bound to H-2D<sup>b</sup>/PF. Interactions between soluble P14 and H-2D<sup>b</sup>/gp33  
114 and H-2D<sup>b</sup>/V3P were also characterized using isothermal titration calorimetry (ITC), revealing  
115 that binding of P14 to H-2D<sup>b</sup>/V3P was mainly enthalpy-driven with almost null contribution of  
116 entropy, whereas binding to H-2D<sup>b</sup>/gp33 was entropically unfavorable (Fig. S1, Table 1). In  
117 conclusion, the p3P modification increases pMHC stability, resulting in recognition of PF by P14  
118 and enhances TCR affinity by decreasing the entropic cost for binding.

119

120 Next, P14 TCR down-regulation was assessed upon exposure to gp33, V3P, Y4F or PF-loaded H-  
121 2D<sup>b+</sup> RMA cells (Fig. 1C). While H-2D<sup>b</sup>/gp33 induced significant TCR down-regulation, none  
122 was detected with Y4F, even at high peptide concentrations. Exposure of P14 T cells to V3P  
123 equaled or increased TCR internalization compared to gp33. Importantly, exposure to PF  
124 significantly increased P14 TCR down-regulation compared to Y4F (Fig. 1C). The crystal  
125 structures of H-2D<sup>b</sup>/V3P and H-2D<sup>b</sup>/PF were determined to 2.5 and 2.6 Å resolution, respectively

126 (Table S1), and compared with H-2D<sup>b</sup>/gp33 [3] and H-2D<sup>b</sup>/Y4F [2] (Fig. 1D, Fig. S2, Fig. S9).  
127 The overall structures of all pMHCs are nearly identical, and the amount of hydrogen bond and  
128 van der Waals interactions formed between H-2D<sup>b</sup> and each p3P-APL was equivalent to each wild-  
129 type epitope counterpart. The backbone of the p3P-APL corresponds exactly to the wild-type  
130 peptides, indicating strict molecular mimicry (Fig. 1D). The root mean square deviation values for  
131 main chain atoms are 0.24-0.67Å<sup>2</sup> and 0.20-0.24Å<sup>2</sup> for the backbone of the H-2D<sup>b</sup> heavy chain  
132 and the peptides, respectively. The only significant conformational differences between wild-type  
133 and p3P-APLs were side chain movements of peptide residues p1K and p6F towards the N-  
134 terminal and middle section of the peptide-binding cleft of H-2D<sup>b</sup>, respectively (Fig. 1D, Fig. S2).

135

### 136 **In contrast to Y4F, PF induces significant P14 T cell responses both *in vitro* and *in vivo***

137 First, we assessed the functional effects of all peptides on P14 T-cell activation by comparing  
138 intracellular TNF and IFN $\gamma$  production, T cell degranulation (CD107a) as well as target cell lysis.  
139 CD8<sup>+</sup> T cells, isolated from spleens of naïve or gp33-immunized P14 transgenic mice (P14-tg),  
140 were co-cultured with RMA cells pulsed with each peptide. Peptides gp33, V3P and PF induced  
141 significant production of TNF and IFN $\gamma$ , as well as CD107a expression, while Y4F failed to induce  
142 any P14 T cell response (Fig. S3). Lysis of RMA cells by P14 T cells was also enhanced with PF  
143 compared to Y4F (Fig. S3). In conclusion, p3P-modification of the immune escape variant Y4F  
144 re-establishes *in vitro* recognition by P14 T cells (Fig. S3).

145

146 We thereafter assessed the *in vivo* impact of the p3P modification on LCMV-activated P14 T cells.  
147 10<sup>4</sup> P14 T-cells were adoptively transferred into C57Bl/6 mice, thereafter infected with the LCMV  
148 clone 13 (Fig. 2). Six days post-infection, P14 T-cells isolated from spleens (Fig. 2A-2B) were  
149 either stained with pMHC tetramers or re-stimulated with 10<sup>-6</sup> M gp33, Y4F or PF. Tetramer



150 staining demonstrated that a significant amount of the activated P14 T cells recognized the H-  
151 2D<sup>b</sup>/PF complex (Fig. 2C-2E). Furthermore, while PF- and gp33-stimulated P14 T-cells produced  
152 TNF and IFN $\gamma$ , Y4F was not recognized (Fig. 2D-2E). Altogether, these results demonstrate that,  
153 in contrast to Y4F, PF is efficiently recognized by P14 T cells *in vivo*-activated by LCMV  
154 infection.

155

### 156 **Vaccination with Influenza encoding for PF activates endogenous CD8<sup>+</sup> T-cells that cross-** 157 **react and recognize the immune escape variant Y4F**

158 Next, we assessed if vaccination with PF could elicit endogenous T cells that cross-react and  
159 recognize Y4F. We engineered Y4F and PF into the stalk region of the Influenza A Neuraminidase  
160 (HKx31). This well-established model results in efficient processing and presentation of epitopes  
161 on infected cells [31]. C57/Bl6 mice were infected with the modified viruses Flu(Y4F) or Flu(PF)  
162 (Fig. 3A). 10 days following infection, CD8<sup>+</sup>CD44<sup>+</sup> splenocytes (Fig S4) were co-stained with H-  
163 2D<sup>b</sup>/gp33-, H-2D<sup>b</sup>/Y4F- and H-2D<sup>b</sup>/PF-tetramers (Fig. 3B-3C). Vaccination with Flu(PF) elicits  
164 endogenous T cell populations that bind to both H-2D<sup>b</sup>/Y4F and H-2D<sup>b</sup>/PF tetramers equally well  
165 (Fig. 3B). Interestingly, Flu(PF) vaccination also elicits endogenous T cell populations with dual  
166 specificity to H-2D<sup>b</sup>/gp33 and H-2D<sup>b</sup>/Y4F tetramers. In contrast, H-2D<sup>b</sup>/gp33-, H-2D<sup>b</sup>/Y4F- and  
167 H-2D<sup>b</sup>/PF-tetramer staining after vaccination with Flu(Y4F) failed to identify any significant T  
168 cell population (Fig. 3B).

169

170 Intracellular expression of IFN $\gamma$  and TNF in CD8<sup>+</sup>CD44<sup>+</sup> endogenous T cells was assessed  
171 following stimulation with peptides gp33, Y4F or PF (Fig. 3C). In contrast to Flu(Y4F),  
172 vaccination with Flu(PF) results in significantly enhanced IFN $\gamma$  and TNF levels towards both Y4F  
173 and PF. However, vaccination with neither Flu(Y4F) nor Flu(PF) induced any elicitation of IFN $\gamma$

174 and TNF towards gp33. This is well in line with previous studies in which the Y4F-specific T cell  
175 clone YF.F3 killed efficiently targets presenting gp33 but did not produce IFN $\gamma$  [32]. Similar  
176 results were obtained using bronchoalveolar lavage (BAL)-derived T cells (Fig. S4). In conclusion,  
177 vaccination with Flu(PF) induces endogenous T cell populations that respond strongly to H-  
178 2D<sup>b</sup>/PF and efficiently cross-react with H-2D<sup>b</sup>/Y4F.

179

### 180 **The T cell receptor P14 binds identically to H-2D<sup>b</sup>/gp33, H-2D<sup>b</sup>/V3P and H-2D<sup>b</sup>/PF**

181 In order to assess the molecular bases underlying the effects of the p3P modification on T cell  
182 recognition, we determined the crystal structures of the ternary complexes P14/H-2D<sup>b</sup>/gp33,  
183 P14/H-2D<sup>b</sup>/V3P and P14/H-2D<sup>b</sup>/PF to 3.2, 2.8 and 1.75 Å resolution, respectively (Table S2, Fig.  
184 S5). All ternary complexes are almost identical with rmsd values of 0.5Å, 0.18-0.28Å, 0.35Å and  
185 0.27-0.31Å for peptide clefts, peptides, TCR $\alpha$  and TCR $\beta$ , respectively. The three ternary  
186 complexes displayed a typical TCR/pMHC binding mode with P14 diagonally positioned over the  
187 pMHC complexes (Fig. S6). The ternary structures revealed very similar TCR contacts with H-  
188 2D<sup>b</sup> presenting the three different peptides, with identical conformations of the six P14 CDR loops  
189 (Fig. S6). Although CDR3 $\alpha$  (101-YGNEK-105) and CDR3 $\beta$  (93-DAGGRNTL-100) are located  
190 over the middle part of each peptide variant, only CDR3 $\beta$  forms hydrogen bonds with the three  
191 peptide residues p4Y, p6F and p8T (Fig. S7). All the other P14 loops CDR1 $\alpha$  (33-EDSTFN-38),  
192 CDR1 $\beta$  (25-NNHDYM-30), CDR2 $\alpha$  (58-LSVS-61) and CDR2 $\beta$  (46-YSY-48) interact with the  
193 H-2D<sup>b</sup> heavy chain (Fig. S7).

194

### 195 **The immune escape mutation Y4F abrogates the hydrogen bond network formed with P14**

196 The P14 CDR3 $\beta$  residues D93, G96 and R97 form a network of hydrogen bonds with the side  
197 chains of the gp33 residues p4Y and p8T, as well as with the backbone of p5N and p8T (Fig. S7).

198 The side chain of R97 $\beta$  runs parallel with the peptide, stretching out to reach to the tip of p4Y,  
199 forming van der Waals interactions with the side chain of p6F, forcing its rotation in the case of  
200 gp33. The TCR residue Y101 $\alpha$ , which side chain is positioned between p1K and p4Y, forms a  
201 hydrogen bond with the H-2D<sup>b</sup> residue E163, which also forms a hydrogen bond with p4Y (Fig.  
202 S7). Thus, the hydroxyl group of p4Y plays a key role in a net of hydrogen bond and van der Waals  
203 interactions formed with TCR residues N38 $\alpha$  and Y101 $\alpha$  as well as the H-2D<sup>b</sup> residue E163. The  
204 Y4F mutation abrogates all these interactions, abolishing P14 recognition (Fig. S7). Furthermore,  
205 the Y4F mutation introduces high hydrophobicity within this key TCR/pMHC interface, composed  
206 mainly by polar residues. Altogether, this explains why P14 does not bind nor recognize the  
207 immune escape variant H-2D<sup>b</sup>/Y4F.

208

### 209 **The p3P modification facilitates TCR recognition**

210 The three ternary TCR/MHC/peptide structures were compared with each corresponding TCR-  
211 unbound pMHC (Fig. 4, Fig. S8). The side chain of p4Y, essential for recognition by P14 [4, 33,  
212 34], rotates down following P14 binding to both H-2D<sup>b</sup>/gp33 and H-2D<sup>b</sup>/V3P (Fig. 4A-B). A  
213 similar rotation was also observed for residue p4F in H-2D<sup>b</sup>/PF upon binding to P14 (Fig. 4C).  
214 The side chain of p6F in gp33 is also affected upon binding to P14 (Fig. 4A). Interestingly, the  
215 p3P modification resulted in a similar conformation for p6F in both H-2D<sup>b</sup>/V3P and H-2D<sup>b</sup>/PF  
216 prior to binding to P14 (Fig. 1D and Fig. 4). Furthermore, the side chain of residue p1K in H-  
217 2D<sup>b</sup>/gp33 also moves towards the N-terminal of the peptide binding cleft following P14 binding  
218 (Fig. 4A), taking an identical conformation as in both p3P-substituted peptides (Fig. 4D).

219

220 One of the most significant differences in H-2D<sup>b</sup>/gp33, before and after binding to P14, is a shift  
221 of the p2-p4 backbone of gp33 when bound to P14, towards the binding cleft of H-2D<sup>b</sup>. Following

222 P14 docking, p3V in gp33 extends 1.2 Å deeper into the D-pocket of H-2D<sup>b</sup>, combined with a 180°  
223 rotation (Fig. 4A). In contrast to gp33, the p2-p4 section is more constrained in both V3P and PF,  
224 following TCR binding (Fig. 4B, 4C). However, it should be noted that the final conformations of  
225 all three peptides in the ternary complexes is nearly identical (Fig. 4D). In conclusion, residues 1  
226 and 6 in p3P-APLs take the same conformations prior to TCR binding as found in the ternary  
227 complexes, potentially enabling a more favorable surface for P14 TCR binding.

228  
229 The crystal structures of TCR-unbound and TCR-bound pMHCs also revealed that conformational  
230 differences in H-2D<sup>b</sup> residues were observed only for residues R62, E163 and H155 (Fig. 5, S2,  
231 S9 and S10). The large movement of p6F in gp33 following binding to P14 induces the counter  
232 wise reorientation of the side chain of residue H155 towards the TCR (Fig. 5A). The redistribution  
233 of H155 and p6F in H-2D<sup>b</sup>/gp33 promotes the adequate positioning of the key TCR residue R97β,  
234 which runs longitudinally along the length of the N-terminal part of the peptide (Fig. S7). In  
235 contrast, residues p6F and H155 are already optimally positioned in both the TCR unbound and  
236 bound forms of the H-2D<sup>b</sup>/V3P and H-2D<sup>b</sup>/PF complexes (Fig. 5B-5C), most probably  
237 predisposing for optimized interactions with P14.

238  
239 Furthermore, p1K in gp33 also takes a different conformation upon binding to P14, bending  
240 backwards towards the H-2D<sup>b</sup> residues R62 and E163, which conformations are affected (Fig. 4A,  
241 5A). Here again, the side chain of p1K takes exactly this conformation in both V3P and PF already  
242 before TCR binding (Fig. 4, 5). Altogether, p1K, P6F and heavy chain residues R62, H155 and  
243 E163 have already adopted in the unbound V3P and PF complexes similar conformations to those  
244 observed in all three ternary structures (Fig. 4, 5). Thus, the p3P substitution potentially facilitates  
245 TCR recognition by positioning specific key peptide and MHC residues prior to the formation of

246 the ternary complexes. This is well in line with our SPR and ITC results, which indicate that the  
247 energy required for P14 recognition of V3P is reduced compared to gp33 (Table 1, Fig. S1).

248

249

## 250 Discussion

251 Subsets of peptide analogs have been used by others and us to both break T cell tolerance and  
252 enhance T cell responses to tumors [16, 23, 35]. Heteroclitic subdominant viral T cell determinants  
253 were also used to enhance both pMHC stability and T cell avidity towards the mouse hepatitis  
254 virus-specific subdominant S598 determinant [22, 36]. Most, if not all studies performed in other  
255 laboratories have focused their efforts on introducing peptide mutations that would significantly  
256 increase the stability of pMHCs with as little alteration as possible of peptide conformation. Here,  
257 instead of mutating a key anchor position, we targeted interactions between peptide position 3 and  
258 the MHC residue Y159, conserved among most known mouse and human alleles. Indeed, besides  
259 H-2D<sup>b</sup>, we have previously demonstrated that the p3P modification enhances significantly the  
260 stability of H-2K<sup>b</sup> in complex with different TAAs [23]. Thus, the p3P modification could  
261 potentially enhance stabilization of other MHC-I alleles that comprise the heavy chain residue  
262 Y159, leading to enhanced TCR recognition.

263  
264 Here, we addressed if we could increase CD8<sup>+</sup> T cell avidity and restore recognition of the viral  
265 escape variant Y4F that binds to H-2D<sup>b</sup> with the same high affinity as gp33 [37]. The TCR P14 is  
266 specific for H-2D<sup>b</sup>/gp33 and it has been previously demonstrated that P14 recognition is abolished  
267 by the Y4F mutation [2, 3]. Comparison of the crystal structures of H-2D<sup>b</sup>/gp33 and H-2D<sup>b</sup>/Y4F  
268 demonstrated that the only structural difference between these two pMHCs was the removal of the  
269 hydroxyl tip from the peptide residue p4 [2]. We demonstrate that the p3P modification in PF  
270 overcomes the restrictions imposed by the Y4F mutation, reestablishing P14 recognition of this  
271 structural mimic of Y4F. Furthermore, we show that it is fully possible to restore endogenous  
272 CD8<sup>+</sup> T cell recognition of Y4F following vaccination with PF. Possibly, the higher avidity of  
273 subsets of the endogenous T cell population for H-2D<sup>b</sup>/PF pushes them over a certain threshold of

274 activation, and the molecular similarities between H-2D<sup>b</sup>/PF and H-2D<sup>b</sup>/Y4F allow for cross-  
275 reactivity, resulting in significant cytokine secretion towards Y4F. However, *in vitro* re-  
276 stimulation with gp33 of endogenous CD8<sup>+</sup> T cells isolated from Flu(PF)-vaccinated mice did not  
277 induce any significant secretion of cytokines, although these endogenous CD8<sup>+</sup> T cells recognized  
278 both PF and gp33-loaded MHC tetramers. Martin *et al* have previously provided evidence for  
279 selective activation of different effector functions in CD8<sup>+</sup> T cells by APLs. More specifically, the  
280 results of their study show that the H-2Db/Y4F-specific T cell clone YF.F3 killed efficiently  
281 targets presenting gp33 but did not produce high amounts IFN $\gamma$  against gp33 [32]. This is well in  
282 line with the results presented in this study. Altogether, this suggests to us that vaccination with a  
283 cocktail of epitopes could provide wider protection against both immunodominant and immune  
284 escape targets.

285  
286 So how does it possibly work at the molecular level? The rigidification of p3P-modified peptides  
287 could enhance TCR recognition by decreasing entropic costs. Indeed, we have previously  
288 demonstrated in TAA models that peptide rigidification enhanced considerably TCR recognition  
289 [26, 27]. Overall the effects of proline replacement on protein stability and function are well  
290 established for a large ensemble of proteins [38], revealing that protein-protein interactions often  
291 occur through regions enriched with proline residues [39]. Proline substitutions increase overall  
292 protein stability as well as the stability of specific protein regions [40]. Indeed, proline replacement  
293 of specific residues in TCR CDR loops can increase significantly recognition of antigens [41]. The  
294 importance of the interaction of peptide residue p3P with residue Y159, conserved amongst most  
295 known MHC-I alleles, has been previously described [27], revealing that p3P reduces significantly  
296 the flexibility of the pMHC complex, thus decreasing unfavorable entropic change upon complex  
297 formation. Such reduced entropic penalties for TCR recognition following p3P mutation were

298 confirmed here by ITC measurements, which indicated reduced unfavorable entropic contribution  
299 for recognition of H-2D<sup>b</sup>/V3P by P14 compared to H-2D<sup>b</sup>/gp33. The importance of the reduction  
300 of peptide conformation heterogeneity for enhanced TCR has been described, using a combination  
301 of crystal structure and molecular dynamic studies [42]. A peptide that must move to optimize the  
302 interactions with the bound TCR will increase the entropic cost for binding, resulting in slower  
303 binding, lower affinity and less efficient recognition [43]. Consequently, although many TCRs  
304 bind with unfavorable entropy changes [37, 44], reduction of conformational heterogeneity  
305 coupled with rigidification of the peptides may lead to enhanced T cell recognition. In this study,  
306 the p3P mutation reduces motion and therefore enhances T cell recognition by increasing T cell  
307 association rate and decreasing entropic costs for binding.

308

309 Although X-ray structural studies of proteins provide accurate snapshots of protein complexes,  
310 crystal structures provide relatively little information about the dynamic bases underlying protein-  
311 protein interactions. The dynamic motions of both pMHC and TCR impact on recognition by T  
312 cells, clearly influencing function and recognition [42]. Here, we compared the crystal structures  
313 of each studied pMHC complex before and after P14 TCR binding (besides the P14/H-2D<sup>b</sup>/Y4F  
314 complex that could not be obtained since P14 does not bind to this pMHC). Peptides tune the  
315 motions of MHC heavy chains and reduced motions may lead to enhanced recognition. Besides  
316 the peptide rigidification imposed by the p3P modification, comparison of a structural snapshot  
317 for each ternary structure with each TCR-unbound pMHC variant indicated an additional structural  
318 reason for the increased TCR recognition of p3P-modified epitopes. In all cases, conformational  
319 differences were observed in peptide residues p1K and p6F in PF and V3P, compared to Y4F and  
320 gp33, before TCR binding. In all p3P cases, the side chains of peptide residues p1K and p6F took  
321 the same conformation, as observed in the ternary structures, prior to TCR binding. In line with



322 this, others [33, 45] and we [37] have previously demonstrated the importance of residue p1K for  
323 recognition by the TCR P14. The crystal structure of the semi-agonist Y4A (KAVANFATM) also  
324 revealed a similar conformation for both p1K and p6F prior to binding to P14 TCR [37].  
325 Furthermore, the conformation of the MHC “TCR footprint” heavy chain residues R62, H155 and  
326 E163 [46, 47] was also affected following p3P substitution, possibly due to the movements of p1K  
327 and p6F. Altogether, prior to TCR landing, the p3P modification alters the conformation of  
328 residues both in the peptide and the MHC heavy chain similar to conformations taken upon binding  
329 to the TCR, thus predisposing the pMHC for facilitated TCR recognition.

330  
331 The results presented within this study indicate in our opinion that i) docking of P14 to p3P-  
332 modified peptides is facilitated since the conformations of key residues in both peptide and heavy  
333 chain are already optimal prior to TCR binding (ready-to-go conformation); ii) consequently, the  
334 energetic costs for TCR recognition should be reduced since there is no need for any major  
335 movement in the rigidified epitope besides the conformational change for residue p4Y. As  
336 vaccination with PF restored endogenous T cell recognition of Y4F, the p3P modification could  
337 thus represent a novel way to increase the immunogenicity of a large array of H-2D<sup>b</sup>-restricted  
338 epitopes as well as possibly viral epitopes restricted by other MHC alleles. We thus describe here  
339 a successful approach to restore recognition of viral escape peptide that can be easily coupled to  
340 already existing vaccination protocols, including vaccination with full-length proteins as well as  
341 *e.g.* modified mRNA vaccines, by introducing the p3P modification in a selection of viral epitopes.

342

## 343 **Materials and Methods**

344

### 345 **Cell lines and mice**

346 H-2D<sup>b</sup>/H-2K<sup>b</sup> RMA cells, kindly provided by Prof. Klas Kärre, were used as target cells in the  
347 functional assays described below. Pathogen-free wild-type (WT) C57BL/6 (B6) and RAG1/2-  
348 deficient (RAG1/2<sup>-/-</sup>) P14-transgenic mice were bred and maintained within the facilities of the MTC  
349 department, Karolinska Institute. V $\alpha$ 2<sup>+</sup> T cells from P14 mice were used as effector cells for *in vitro*  
350 experiments. P14 mice were used for *in vivo* T-cell stimulation assays.

351

### 352 **Peptides and antibodies**

353 Peptides gp33, Y4F, V3P and PF as well as control peptides NP<sub>366</sub> (ASNENMETM) and P18-I10  
354 (RGPGRFVVTI) were purchased from GenScript (Piscataway, NJ, USA). Antibodies 53-6.7 (anti-  
355 CD8 $\alpha$ ), 53-5.8 (anti-CD8 $\beta$ ), XMG1.2 (anti-IFN- $\gamma$ ), MP6-XT22 (anti-TNF), 145-2C11 (anti-CD3 $\epsilon$ ),  
356 1D4B (anti-CD107a), BP-1 (anti-Ly5.1/CD249), IM7 (anti-CD44) and B20.1 (anti-TCR V $\alpha$ 2) were  
357 purchased from BD Biosciences (San Diego, CA, USA). Antibodies GK1.5 (anti-CD4) and H57-597  
358 (anti-TCR C $\beta$ ) were purchased from Abcam (Cambridge, UK) and eBioscience (San Diego, CA,  
359 USA), respectively.

360

### 361 **Preparation, refolding and crystallization of TCR/pMHC complexes**

362 Refolding of all pMHCs was conducted as previously described [48]. P14 was produced and refolded  
363 by dilution and thereafter-purified using ion exchange and size exclusion chromatography. Crystals  
364 for H-2D<sup>b</sup>/V3P and H-2D<sup>b</sup>/PF were obtained by hanging drop vapor diffusion in 1.6-1.8 M  
365 ammonium sulfate, 0.1 M Tris HCl pH 7.0-9.0. Crystals for P14/H-2D<sup>b</sup>/gp33, P14/H-2D<sup>b</sup>/V3P and

366 P14/H-2D<sup>b</sup>/PF were obtained by hanging drop vapor diffusion in 19% PEG 6000, 0.1 M Tris HCl  
367 pH 8.0.

368

### 369 **Data collection, processing and structure determination**

370 Data collection was performed at beam lines ID14-2 and ID23-2 at ESRF (Grenoble, France).  
371 Diffraction data were processed and scaled using MOSFLM 7.0.3 and SCALA [49]. Crystal  
372 structures were determined by molecular replacement using PHASER [50]. The crystal structure of  
373 H-2D<sup>b</sup>/gp33 (PDB ID: 1S7U) [2], with omitted peptide, was used as search model for H-2D<sup>b</sup>/V3P  
374 and H-2D<sup>b</sup>/PF. P14/H-2D<sup>b</sup>/gp33, P14/H-2D<sup>b</sup>/V3P and P14/H-2D<sup>b</sup>/PF were determined using 3PQY  
375 [51]. In all cases, poorer electron density was displayed for the TCR C $\alpha$  domain, probably due to  
376 high flexibility, as previously observed [52]. Random 5% reflections were used for monitoring  
377 refinement by R<sub>free</sub> cross-validation [53]. The model was rebuilt in Coot where necessary. The  
378 stereochemistry of the final models was verified using PROCHECK [54] or Coot [55].

379

### 380 **Circular dichroism (CD) analysis**

381 Measurements were performed in 20mM K<sub>2</sub>HPO<sub>4</sub>/KH<sub>2</sub>PO<sub>4</sub> (pH 7.5) using 0.15-0.3 mg/ml protein  
382 concentrations. Melting temperatures (T<sub>m</sub>) were derived from changes in ellipticity at 218 nm as  
383 previously described [37]. Curves and T<sub>m</sub> values are an average of at least three measurements from  
384 at least two independent refolding assays per pMHC. Spectra were analyzed using GraphPad Prism  
385 5 (La Jolla, USA).

386

### 387 **Surface Plasmon Resonance (SPR) binding affinity analysis**

388 All measurements were performed on BIAcore 2000 (GE Healthcare, USA) at 25°C. Soluble P14  
389 (20  $\mu$ g/ml) was non-covalently coupled to the anti-C $\beta$  antibody H57-597. 8000 RUs of H57-597 were

390 coupled to a CM5-chip, resulting in 3000RUs immobilized P14. A control surface without antibody  
391 was used as reference. Concentration series of pMHCs were injected over the chip. The surface was  
392 regenerated with 40  $\mu$ l 0.1 M Glycine-HCl, 500 mM NaCl, pH 2.5. Unspecific binding was corrected  
393 for by subtracting responses from reference flow cells. Data were analyzed with BIAevaluation 2000  
394 (BIAcore AB, Uppsala, Sweden).  $K_D$ -values were obtained from steady-state fitting of equilibrium  
395 binding curves from at least two independent measurements.

396

### 397 **Isothermal titration calorimetry (ITC)**

398 Measurements were performed on a MicroCal iTC 200 (GE Healthcare, USA) at 25°C. 40  $\mu$ l H-  
399 2D<sup>b</sup>/V3P (125 $\mu$ M) or H-2D<sup>b</sup>/gp33 (150  $\mu$ M) in 10 mM Hepes, 150 mM NaCl, pH 7.4 were titrated  
400 into 300  $\mu$ l of P14 (12.5-15  $\mu$ M) in 10 injections under 1000 rpm stirring rate. Data analysis was  
401 performed using Origin, fitted to a non-linear curve in an iterative process. The reported constants  
402 are an average of two independent experiments.

403

### 404 **TCR down-regulation assays**

405 P14-splenocytes were mixed with peptide-pulsed RMA cells at 10:1 effector:target (E:T) ratio. Cells  
406 were co-incubated at 37°C for 4 h and stained with anti-CD8 $\beta$  and -TCR V $\alpha$ 2 antibodies. Flow  
407 cytometry was performed using FACSCalibur (BD Biosciences) and changes in mean fluorescence  
408 intensity (MFI) of the V $\alpha$ 2 staining were used to estimate TCR down-regulation. Data was analyzed  
409 using Flowjo (Tree Star, Inc., Ashland, OR, USA).

410

### 411 ***In vivo* stimulation of P14 T cells and Cr<sup>51</sup> release cytotoxicity assays**

412 P14 TCR-transgenic mice were injected subcutaneously (SC) with 100  $\mu$ g gp33 in PBS combined  
413 with 12.5 ng phosphorothioate-modified CpG-ODN 1668 (Invivogene, Sweden). 20 mg Aldara

414 cream was applied at site of injection (5% imiquimod, Meda AB, Sweden). Animals were  
415 sacrificed 7 days later and spleens were recovered. Target RMA cells, labeled with Cr<sup>51</sup>, were  
416 pulsed with indicated peptide concentrations for 1 h at 37°C and subsequently mixed with *in vivo*-  
417 stimulated negatively selected (MACS CD8<sup>+</sup> T cell isolation kit, Miltenyl Biotec, Germany) P14  
418 CD8<sup>+</sup> T cells at 3:1 E:T ratio followed by a standard 4h Cr<sup>51</sup>-release assay. Radioactivity was  
419 measured on a  $\gamma$ -counter (Wallac, Uppsala, Sweden). Percentage of specific lysis was calculated  
420 as [Cr<sup>51</sup> release in test well – spontaneous Cr<sup>51</sup> release] / [maximum Cr<sup>51</sup> release – spontaneous  
421 Cr<sup>51</sup> release] x 100.

422

### 423 **CD107a degranulation, intracellular IFN $\gamma$ and TNF production**

424 CD8<sup>+</sup> T cells isolated from spleens of naïve or *in vivo*-stimulated P14 transgenic mice were co-  
425 cultured for 5 h with 10<sup>-6</sup> M or 10<sup>-8</sup> M peptide-pulsed RMA cells in the presence of anti-CD107a  
426 antibody for degranulation assays. GolgiStop (BD Biosciences) was added after 1 h co-incubation.  
427 4 h later, cells were stained with anti-CD8 $\alpha$  and -CD3 $\epsilon$  antibodies. For intracellular cytokine  
428 staining assays, cells were fixed and permeabilized using the Cytofix/Cytoperm kit (BD  
429 Biosciences) according to instructions. Cells were thereafter stained for IFN $\gamma$  and TNF expression.  
430 FACS sampling was performed on CyAn (Dako, Glostrup, Denmark) and analyzed with FlowJo.

431

### 432 **MHC-I tetramer production**

433 H-2D<sup>b</sup> molecules with a biotinylation tag were refolded with peptides and m $\beta$ <sub>2</sub>m in the presence of  
434 protease inhibitors and purified as previously described [56]. Each obtained monomeric H-  
435 2D<sup>b</sup>/peptide complex (0.5 mg/ml) was tetramerized at a 4:1 ratio with streptavidin-PE (BD  
436 Biosciences).

437

## 438 **Identification of P14 CD8<sup>+</sup> T cell responses upon LCMV vaccination**

439 10<sup>4</sup> P14 T cells (CD44<sup>low</sup>, Ly5.1<sup>+</sup>), isolated from spleens of P14 transgenic mice, were adoptively  
440 transferred intravenously (in PBS) into C57Bl/6 mice three days prior to intraperitoneal infection with  
441 1x10<sup>6</sup> PFU of LCMV (Clone 13). Spleens were harvested on day 7 post infection. CD8<sup>+</sup> T cells were  
442 enriched by B cell panning and red blood cell lysis and stimulated with IL-2 (25 units/ml), Brefeldin  
443 A (5 µg/ml) (BD Biosciences) and 10<sup>-6</sup>M peptide (gp33, Y4F or PF or no peptide) in complete RPMI  
444 for 5 h at 37°C, 5% CO<sub>2</sub>. Washed cells were surface stained with anti-CD8, -CD44 and -Ly5.1, fixed  
445 and permeabilized using BD cytofix/cytoperm kit (25 min at 4°C). Intracellular staining of IFN $\gamma$ ,  
446 TNF and IL-2 (at 1:200) was performed for 30 min at 4°C. Endogenous T cells were distinguished  
447 by congenic marker Ly.5.2 from Ly.5.1<sup>+</sup> P14 T cells. Cells were resuspended in FACS buffer after  
448 enrichment and stained at 1:400 for 1hr at RT with gp33, Y4F or PF tetramers. Washed cells were  
449 surface stained for CD8, Ly5.1, CD107a and CD44 for 30 min at 4°C. Data was collected using LSR  
450 Fortessa (BD Biosciences) and analyzed with Flowjo.

451

## 452 **Cloning of Plasmids**

453 pHW2000 vectors containing the 8 genes (PB2, PB1, PA, HA, NP, NA, M and NS), where NA  
454 and HA are derived from HKx31 (H3N2), and the internal genes from A/PR8/34 (PR8, H1N1),  
455 were constructed by reverse transcriptase-PCR (RT-PCR) amplification of the viral RNA. The  
456 peptides Y4F and PF were introduced into the Influenza A virus by inserting/replacing a region in  
457 the stalk of Neuraminidase (NA) using the cloning system as described.

458

## 459 **Viruses and Cell Culture**

460 Reverse genetics, generation of modified Influenza: Briefly, 1 µg of each plasmid (NP, NS2, PB2,  
461 M, PA, PB1, HA and NA) was mixed with 16µg of lipofectomine and OptiMEM and added to a

462 mix of co-cultured MDCK/293T cells, in the presence of TPCK-trypsin. The transfection was  
463 allowed to proceed for 48-72h in 5% CO<sub>2</sub> at 37°C. The virus was thereafter propagated in chicken  
464 eggs for 2 days at 35° [57].

465

#### 466 **RNA Isolation and RT-PCR**

467 Viral RNA was isolated from virus particles with RNeasy-Kit (Qiagen, Valencia, CA). Access  
468 RT-PCR kit (Promega) was used for characterization of recombinant influenza viruses.

469

#### 470 **Identification of T cell responses upon Influenza vaccination**

471 Naive C57Bl6 mice were adoptively transferred with 10<sup>4</sup> P14 T cells one day prior to infection. with  
472 1 x10<sup>4</sup> PFU or i.p. with 1.5 x10<sup>7</sup> PFU of influenza A virus following anesthesia with isoflurane, then  
473 used for analysis of primary immunity at day 10 post infection. Kinetics, magnitude and phenotype  
474 of primary virus-specific CD8<sup>+</sup> T cell responses were measured by flow cytometry. gp33- and APL-  
475 specific CD8<sup>+</sup> T cell populations were characterized using H2D<sup>b</sup>/gp33, Y4F and PF tetramers.  
476 Splenocytes were incubated with tetramers for 60 min at room temperature. Washed cells were  
477 stained for CD8<sup>+</sup> and CD44 for 30 min at 4°C. Intracellular IFN $\gamma$  and TNF staining (1:200) was  
478 performed for 30 min at 4°C. Data was collected using LSR Fortessa (BD Biosciences) and analyzed  
479 with Flowjo.

480

#### 481 **Statistical analysis**

482 Data were routinely shown as mean  $\pm$  SD. Unless stated otherwise, statistical significance was  
483 determined by the Student's t test or analysis of variance (ANOVA) using GraphPad Prism 7.0.

484 \*P < 0.05; \*\*P < 0.01; \*\*\*P < 0.001; \*\*\*\*P < 0.0001.

485

486 **Ethics statement**

487 All experimental animal procedures were performed under Swedish national guidelines (N413/09)  
488 and following approval from the University of Melbourne animal ethics experimentation committee  
489 (ethics number 1312890.3).

490

491



## 492 References

- 493 1. Yewdell JW, Bennink JR. Immunodominance in major histocompatibility complex class  
494 I-restricted T lymphocyte responses. *Annu Rev Immunol.* 1999;17:51-88. Epub 1999/06/08. doi:  
495 10.1146/annurev.immunol.17.1.51. PubMed PMID: 10358753.
- 496 2. Velloso LM, Michaelsson J, Ljunggren HG, Schneider G, Achour A. Determination of  
497 structural principles underlying three different modes of lymphocytic choriomeningitis virus  
498 escape from CTL recognition. *J Immunol.* 2004;172(9):5504-11. Epub 2004/04/22. PubMed  
499 PMID: 15100292.
- 500 3. Achour A, Michaelsson J, Harris RA, Odeberg J, Grufman P, Sandberg JK, et al. A  
501 structural basis for LCMV immune evasion: subversion of H-2D(b) and H-2K(b) presentation of  
502 gp33 revealed by comparative crystal structure. *Analyses. Immunity.* 2002;17(6):757-68. PubMed  
503 PMID: 12479822.
- 504 4. Pircher H, Moskophidis D, Rohrer U, Burki K, Hengartner H, Zinkernagel RM. Viral  
505 escape by selection of cytotoxic T cell-resistant virus variants in vivo. *Nature.*  
506 1990;346(6285):629-33. doi: 10.1038/346629a0. PubMed PMID: 1696684.
- 507 5. Petrovic D, Dempsey E, Doherty DG, Kelleher D, Long A. Hepatitis C virus--T-cell  
508 responses and viral escape mutations. *European journal of immunology.* 2012;42(1):17-26. Epub  
509 2011/11/30. doi: 10.1002/eji.201141593. PubMed PMID: 22125159.
- 510 6. Gileadi U, Gallimore A, Van der Bruggen P, Cerundolo V. Effect of epitope flanking  
511 residues on the presentation of N-terminal cytotoxic T lymphocyte epitopes. *European journal of*  
512 *immunology.* 1999;29(7):2213-22. Epub 1999/07/31. doi: 10.1002/(SICI)1521-  
513 4141(199907)29:07<2213::AID-IMMU2213>3.0.CO;2-8 [pii]  
514 10.1002/(SICI)1521-4141(199907)29:07<2213::AID-IMMU2213>3.0.CO;2-8.  
515 PubMed PMID: 10427984.
- 516 7. Seifert U, Liermann H, Racanelli V, Halenius A, Wiese M, Wedemeyer H, et al. Hepatitis  
517 C virus mutation affects proteasomal epitope processing. *The Journal of clinical investigation.*  
518 2004;114(2):250-9. Epub 2004/07/16. doi: 10.1172/JCI20985. PubMed PMID: 15254592;  
519 PubMed Central PMCID: PMC449747.
- 520 8. Price GE, Ou R, Jiang H, Huang L, Moskophidis D. Viral escape by selection of cytotoxic  
521 T cell-resistant variants in influenza A virus pneumonia. *The Journal of experimental medicine.*  
522 2000;191(11):1853-67. Epub 2000/06/06. PubMed PMID: 10839802; PubMed Central PMCID:  
523 PMC2213532.
- 524 9. Erickson AL, Kimura Y, Igarashi S, Eichelberger J, Houghton M, Sidney J, et al. The  
525 outcome of hepatitis C virus infection is predicted by escape mutations in epitopes targeted by  
526 cytotoxic T lymphocytes. *Immunity.* 2001;15(6):883-95. Epub 2002/01/05. doi: S1074-  
527 7613(01)00245-X [pii]. PubMed PMID: 11754811.
- 528 10. Butler NS, Theodossis A, Webb AI, Dunstone MA, Nastovska R, Ramarathinam SH, et al.  
529 Structural and biological basis of CTL escape in coronavirus-infected mice. *Journal of*  
530 *immunology.* 2008;180(6):3926-37. Epub 2008/03/07. doi: 180/6/3926 [pii]. PubMed PMID:  
531 18322201.
- 532 11. Bertoletti A, Sette A, Chisari FV, Penna A, Levrero M, De Carli M, et al. Natural variants  
533 of cytotoxic epitopes are T-cell receptor antagonists for antiviral cytotoxic T cells. *Nature.*  
534 1994;369(6479):407-10. Epub 1994/06/02. doi: 10.1038/369407a0. PubMed PMID: 8196768.

- 535 12. Bowen DG, Walker CM. Mutational escape from CD8+ T cell immunity: HCV evolution,  
536 from chimpanzees to man. *The Journal of experimental medicine*. 2005;201(11):1709-14. Epub  
537 2005/06/09. doi: [jem.20050808](https://doi.org/10.1084/jem.20050808) [pii]  
538 10.1084/jem.20050808. PubMed PMID: 15939787; PubMed Central PMCID: PMC2213256.
- 539 13. Goulder PJ, Watkins DI. HIV and SIV CTL escape: implications for vaccine design. *Nat*  
540 *Rev Immunol*. 2004;4(8):630-40. Epub 2004/08/03. doi: 10.1038/nri1417  
541 nri1417 [pii]. PubMed PMID: 15286729.
- 542 14. Barouch DH, Kunstman J, Kuroda MJ, Schmitz JE, Santra S, Peyerl FW, et al. Eventual  
543 AIDS vaccine failure in a rhesus monkey by viral escape from cytotoxic T lymphocytes. *Nature*.  
544 2002;415(6869):335-9. doi: 10.1038/415335a. PubMed PMID: 11797012.
- 545 15. Valkenburg SA, Gras S, Guillonneau C, La Gruta NL, Thomas PG, Purcell AW, et al.  
546 Protective efficacy of cross-reactive CD8+ T cells recognising mutant viral epitopes depends on  
547 peptide-MHC-I structural interactions and T cell activation threshold. *PLoS Pathog*. 2010;6(8).  
548 Epub 2010/08/17. doi: 10.1371/journal.ppat.1001039. PubMed PMID: 20711359; PubMed  
549 Central PMCID: PMC2920842.
- 550 16. Purcell AW, McCluskey J, Rossjohn J. More than one reason to rethink the use of peptides  
551 in vaccine design. *Nature reviews Drug discovery*. 2007;6(5):404-14. doi: 10.1038/nrd2224.  
552 PubMed PMID: 17473845.
- 553 17. Chen W, Khilko S, Fecondo J, Margulies DH, McCluskey J. Determinant selection of  
554 major histocompatibility complex class I-restricted antigenic peptides is explained by class I-  
555 peptide affinity and is strongly influenced by nondominant anchor residues. *The Journal of*  
556 *experimental medicine*. 1994;180(4):1471-83. Epub 1994/10/01. PubMed PMID: 7523572;  
557 PubMed Central PMCID: PMC2191679.
- 558 18. Borbulevych OY, Baxter TK, Yu Z, Restifo NP, Baker BM. Increased immunogenicity of  
559 an anchor-modified tumor-associated antigen is due to the enhanced stability of the peptide/MHC  
560 complex: implications for vaccine design. *Journal of immunology*. 2005;174(8):4812-20. Epub  
561 2005/04/09. PubMed PMID: 15814707; PubMed Central PMCID: PMC2241749.
- 562 19. Pogue RR, Eron J, Frelinger JA, Matsui M. Amino-terminal alteration of the HLA-  
563 A\*0201-restricted human immunodeficiency virus pol peptide increases complex stability and in  
564 vitro immunogenicity. *Proc Natl Acad Sci U S A*. 1995;92(18):8166-70. Epub 1995/08/29.  
565 PubMed PMID: 7545295; PubMed Central PMCID: PMC41117.
- 566 20. Webb AI, Dunstone MA, Chen W, Aguilar MI, Chen Q, Jackson H, et al. Functional and  
567 structural characteristics of NY-ESO-1-related HLA A2-restricted epitopes and the design of a  
568 novel immunogenic analogue. *The Journal of biological chemistry*. 2004;279(22):23438-46. Epub  
569 2004/03/09. doi: 10.1074/jbc.M314066200. PubMed PMID: 15004033.
- 570 21. Kalergis AM, Ono T, Wang F, DiLorenzo TP, Honda S, Nathenson SG. Single amino acid  
571 replacements in an antigenic peptide are sufficient to alter the TCR V beta repertoire of the  
572 responding CD8+ cytotoxic lymphocyte population. *Journal of immunology*. 1999;162(12):7263-  
573 70. Epub 1999/06/08. PubMed PMID: 10358174.
- 574 22. Butler NS, Theodosis A, Webb AI, Nastovska R, Ramarathinam SH, Dunstone MA, et al.  
575 Prevention of cytotoxic T cell escape using a heteroclitic subdominant viral T cell determinant.  
576 *PLoS Pathog*. 2008;4(10):e1000186. Epub 2008/10/25. doi: 10.1371/journal.ppat.1000186.  
577 PubMed PMID: 18949029; PubMed Central PMCID: PMC2563037.
- 578 23. van Stipdonk MJ, Badia-Martinez D, Sluijter M, Offringa R, van Hall T, Achour A. Design  
579 of agonistic altered peptides for the robust induction of CTL directed towards H-2Db in complex

- 580 with the melanoma-associated epitope gp100. *Cancer research*. 2009;69(19):7784-92. doi:  
581 10.1158/0008-5472.CAN-09-1724. PubMed PMID: 19789338.
- 582 24. Doorduyn EM, Sluijter M, Querido BJ, Oliveira CC, Achour A, Ossendorp F, et al. TAP-  
583 independent self-peptides enhance T cell recognition of immune-escaped tumors. *The Journal of*  
584 *clinical investigation*. 2016;126(2):784-94. doi: 10.1172/JCI83671. PubMed PMID: 26784543;  
585 PubMed Central PMCID: PMC4731191.
- 586 25. Hafstrand I, Doorduyn EM, Duru AD, Buratto J, Oliveira CC, Sandalova T, et al. The  
587 MHC Class I Cancer-Associated Neoepitope Trh4 Linked with Impaired Peptide Processing  
588 Induces a Unique Noncanonical TCR Conformer. *Journal of immunology*. 2016;196(5):2327-34.  
589 doi: 10.4049/jimmunol.1502249. PubMed PMID: 26800871.
- 590 26. Hafstrand I, Doorduyn EM, Sun R, Talyzina A, Sluijter M, Pellegrino S, et al. The  
591 Immunogenicity of a Proline-Substituted Altered Peptide Ligand toward the Cancer-Associated  
592 TEIPP Neoepitope Trh4 Is Unrelated to Complex Stability. *Journal of immunology*.  
593 2018;200(8):2860-8. doi: 10.4049/jimmunol.1700228. PubMed PMID: 29507106.
- 594 27. Uchtenhagen H, Abualrous ET, Stahl E, Allerbring EB, Sluijter M, Zacharias M, et al.  
595 Proline substitution independently enhances H-2D(b) complex stabilization and TCR recognition  
596 of melanoma-associated peptides. *European journal of immunology*. 2013;43(11):3051-60.  
597 PubMed PMID: 23939911.
- 598 28. Moskophidis D, Zinkernagel RM. Immunobiology of cytotoxic T-cell escape mutants of  
599 lymphocytic choriomeningitis virus. *Journal of virology*. 1995;69(4):2187-93. PubMed PMID:  
600 7533851; PubMed Central PMCID: PMC188887.
- 601 29. Aebischer T, Moskophidis D, Rohrer UH, Zinkernagel RM, Hengartner H. In vitro  
602 selection of lymphocytic choriomeningitis virus escape mutants by cytotoxic T lymphocytes.  
603 *Proceedings of the National Academy of Sciences of the United States of America*.  
604 1991;88(24):11047-51. PubMed PMID: 1722316; PubMed Central PMCID: PMC53070.
- 605 30. Puglielli MT, Zajac AJ, van der Most RG, Dzuris JL, Sette A, Altman JD, et al. In vivo  
606 selection of a lymphocytic choriomeningitis virus variant that affects recognition of the GP33-43  
607 epitope by H-2Db but not H-2Kb. *Journal of virology*. 2001;75(11):5099-107. doi:  
608 10.1128/JVI.75.11.5099-5107.2001. PubMed PMID: 11333891; PubMed Central PMCID:  
609 PMC114915.
- 610 31. Jenkins MR, Webby R, Doherty PC, Turner SJ. Addition of a prominent epitope affects  
611 influenza A virus-specific CD8+ T cell immunodominance hierarchies when antigen is limiting.  
612 *Journal of immunology*. 2006;177(5):2917-25. PubMed PMID: 16920927.
- 613 32. Martin S, Kohler H, Weltzien HU, Leipner C. Selective activation of CD8 T cell effector  
614 functions by epitope variants of lymphocytic choriomeningitis virus glycoprotein. *Journal of*  
615 *immunology*. 1996;157(6):2358-65. PubMed PMID: 8805633.
- 616 33. Tian S, Maile R, Collins EJ, Frelinger JA. CD8+ T cell activation is governed by TCR-  
617 peptide/MHC affinity, not dissociation rate. *Journal of immunology*. 2007;179(5):2952-60. Epub  
618 2007/08/22. doi: 179/5/2952 [pii]. PubMed PMID: 17709510.
- 619 34. Tissot AC, Ciatto C, Mittl PR, Grutter MG, Pluckthun A. Viral escape at the molecular  
620 level explained by quantitative T-cell receptor/peptide/MHC interactions and the crystal structure  
621 of a peptide/MHC complex. *Journal of molecular biology*. 2000;302(4):873-85. Epub 2000/09/20.  
622 doi: 10.1006/jmbi.2000.4501  
623 S0022-2836(00)94501-7 [pii]. PubMed PMID: 10993729.

- 624 35. Dyall R, Bowne WB, Weber LW, LeMaoult J, Szabo P, Moroi Y, et al. Heteroclitic  
625 immunization induces tumor immunity. *The Journal of experimental medicine*. 1998;188(9):1553-  
626 61. PubMed PMID: 9802967; PubMed Central PMCID: PMC2212523.
- 627 36. Trujillo JA, Gras S, Twist KA, Croft NP, Channappanavar R, Rossjohn J, et al. Structural  
628 and functional correlates of enhanced antiviral immunity generated by heteroclitic CD8 T cell  
629 epitopes. *Journal of immunology*. 2014;192(11):5245-56. doi: 10.4049/jimmunol.1400111.  
630 PubMed PMID: 24795457; PubMed Central PMCID: PMC4052115.
- 631 37. Allerbring EB, Duru AD, Uchtenhagen H, Madhurantakam C, Tomek MB, Grimm S, et  
632 al. Unexpected T-cell recognition of an altered peptide ligand is driven by reversed  
633 thermodynamics. *European journal of immunology*. 2012;42(11):2990-3000. doi:  
634 10.1002/eji.201242588. PubMed PMID: 22837158.
- 635 38. Bhattacharyya R, Chakrabarti P. Stereospecific interactions of proline residues in protein  
636 structures and complexes. *Journal of molecular biology*. 2003;331(4):925-40. Epub 2003/08/12.  
637 doi: S0022283603007599 [pii]. PubMed PMID: 12909019.
- 638 39. Biedermannova L, K ER, Berka K, Hobza P, Vondrasek J. Another role of proline:  
639 stabilization interactions in proteins and protein complexes concerning proline and tryptophane.  
640 *Phys Chem Chem Phys*. 2008;10(42):6350-9. Epub 2008/10/31. doi: 10.1039/b805087b. PubMed  
641 PMID: 18972023.
- 642 40. Yu H, Zhao Y, Guo C, Gan Y, Huang H. The role of proline substitutions within flexible  
643 regions on thermostability of luciferase. *Biochim Biophys Acta*. 2015;1854(1):65-72. Epub  
644 2014/12/03. doi: 10.1016/j.bbapap.2014.10.017  
645 S1570-9639(14)00277-5 [pii]. PubMed PMID: 25448017.
- 646 41. Haidar JN, Zhu W, Lypowy J, Pierce BG, Bari A, Persaud K, et al. Backbone flexibility of  
647 CDR3 and immune recognition of antigens. *Journal of molecular biology*. 2014;426(7):1583-99.  
648 Epub 2014/01/02. doi: 10.1016/j.jmb.2013.12.024  
649 S0022-2836(13)00811-5 [pii]. PubMed PMID: 24380763.
- 650 42. Ayres CM, Corcelli SA, Baker BM. Peptide and Peptide-Dependent Motions in MHC  
651 Proteins: Immunological Implications and Biophysical Underpinnings. *Front Immunol*.  
652 2017;8:935. Epub 2017/08/22. doi: 10.3389/fimmu.2017.00935. PubMed PMID: 28824655;  
653 PubMed Central PMCID: PMC5545744.
- 654 43. Garboczi DN, Ghosh P, Utz U, Fan QR, Biddison WE, Wiley DC. Structure of the complex  
655 between human T-cell receptor, viral peptide and HLA-A2. *Nature*. 1996;384(6605):134-41. doi:  
656 10.1038/384134a0. PubMed PMID: 8906788.
- 657 44. Armstrong KM, Insaiddo FK, Baker BM. Thermodynamics of T-cell receptor-  
658 peptide/MHC interactions: progress and opportunities. *Journal of molecular recognition : JMR*.  
659 2008;21(4):275-87. doi: 10.1002/jmr.896. PubMed PMID: 18496839; PubMed Central PMCID:  
660 PMC3674762.
- 661 45. Wang B, Sharma A, Maile R, Saad M, Collins EJ, Frelinger JA. Peptidic termini play a  
662 significant role in TCR recognition. *J Immunol*. 2002;169(6):3137-45. doi:  
663 10.4049/jimmunol.169.6.3137. PubMed PMID: 12218131.
- 664 46. Baker BM, Turner RV, Gagnon SJ, Wiley DC, Biddison WE. Identification of a crucial  
665 energetic footprint on the alpha helix of human histocompatibility leukocyte antigen (HLA)-A2  
666 that provides functional interactions for recognition by tax peptide/HLA-A2-specific T cell  
667 receptors. *The Journal of experimental medicine*. 2001;193(5):551-62. PubMed PMID: 11238586;  
668 PubMed Central PMCID: PMC2193388.

- 669 47. Baxter TK, Gagnon SJ, Davis-Harrison RL, Beck JC, Binz AK, Turner RV, et al. Strategic  
670 mutations in the class I major histocompatibility complex HLA-A2 independently affect both  
671 peptide binding and T cell receptor recognition. *The Journal of biological chemistry*.  
672 2004;279(28):29175-84. doi: 10.1074/jbc.M403372200. PubMed PMID: 15131131.
- 673 48. Achour A, Harris RA, Persson K, Sundback J, Sentman CL, Schneider G, et al. Murine  
674 class I major histocompatibility complex H-2Dd: expression, refolding and crystallization. *Acta*  
675 *Crystallogr D Biol Crystallogr*. 1999;55(Pt 1):260-2. Epub 1999/03/25. doi:  
676 10.1107/S0907444998005265  
677 S0907444998005265 [pii]. PubMed PMID: 10089418.
- 678 49. Evans P. Scaling and assessment of data quality. *Acta crystallographica Section D,*  
679 *Biological crystallography*. 2006;62(Pt 1):72-82. Epub 2005/12/22. doi:  
680 10.1107/S0907444905036693. PubMed PMID: 16369096.
- 681 50. McCoy AJ, Grosse-Kunstleve RW, Adams PD, Winn MD, Storoni LC, Read RJ. Phaser  
682 crystallographic software. *J Appl Crystallogr*. 2007;40(Pt 4):658-74. Epub 2007/08/01. doi:  
683 10.1107/S0021889807021206. PubMed PMID: 19461840; PubMed Central PMCID:  
684 PMC2483472.
- 685 51. Day EB, Guillonneau C, Gras S, La Gruta NL, Vignali DA, Doherty PC, et al. Structural  
686 basis for enabling T-cell receptor diversity within biased virus-specific CD8+ T-cell responses.  
687 *Proceedings of the National Academy of Sciences of the United States of America*.  
688 2011;108(23):9536-41. Epub 2011/05/25. doi: 1106851108 [pii]  
689 10.1073/pnas.1106851108. PubMed PMID: 21606376; PubMed Central PMCID: PMC3111262.
- 690 52. Dunn SM, Rizkallah PJ, Baston E, Mahon T, Cameron B, Moysey R, et al. Directed  
691 evolution of human T cell receptor CDR2 residues by phage display dramatically enhances affinity  
692 for cognate peptide-MHC without increasing apparent cross-reactivity. *Protein Sci*.  
693 2006;15(4):710-21. Epub 2006/04/08. doi: 15/4/710 [pii]  
694 10.1110/ps.051936406. PubMed PMID: 16600963; PubMed Central PMCID: PMC2242494.
- 695 53. Brunger AT. Free R value: a novel statistical quantity for assessing the accuracy of crystal  
696 structures. *Nature*. 1992;355(6359):472-5. Epub 1992/01/30. PubMed PMID: 18481394.
- 697 54. Laskowski RA, Moss DS, Thornton JM. Main-chain bond lengths and bond angles in  
698 protein structures. *Journal of molecular biology*. 1993;231(4):1049-67. PubMed PMID: 8515464.
- 699 55. Emsley P, Cowtan K. Coot: model-building tools for molecular graphics. *Acta Crystallogr*  
700 *D Biol Crystallogr*. 2004;60(Pt 12 Pt 1):2126-32. Epub 2004/12/02. doi: S0907444904019158 [pii]  
701 10.1107/S0907444904019158. PubMed PMID: 15572765.
- 702 56. Michaelsson J, Achour A, Salcedo M, Kase-Sjostrom A, Sundback J, Harris RA, et al.  
703 Visualization of inhibitory Ly49 receptor specificity with soluble major histocompatibility  
704 complex class I tetramers. *European journal of immunology*. 2000;30(1):300-7. Epub 1999/12/22.  
705 doi: 10.1002/1521-4141(200001)30:1<300::AID-IMMU300>3.0.CO;2-S. PubMed PMID:  
706 10602053.
- 707 57. Hoffmann E, Neumann G, Kawaoka Y, Hobom G, Webster RG. A DNA transfection  
708 system for generation of influenza A virus from eight plasmids. *Proceedings of the National*  
709 *Academy of Sciences of the United States of America*. 2000;97(11):6108-13. doi:  
710 10.1073/pnas.100133697. PubMed PMID: 10801978; PubMed Central PMCID: PMC18566.

711

712

713 **Figure Legends**

714

715 **Figure 1. The p3P modification enhances pMHC stability without altering structural**  
716 **conformation, reestablishing TCR recognition.**

717 **A. The p3P modification increases pMHC stability.** CD melting curves of H-2D<sup>b</sup>/gp33 and H-  
718 2D<sup>b</sup>/V3P (upper panel), and H-2D<sup>b</sup>/Y4F and H-2D<sup>b</sup>/PF (lower panel). Melting temperatures ( $T_m$ )  
719 corresponding to 50% protein denaturation are indicated. **B. The APL PF is recognized by the**  
720 **soluble TCR P14.** In contrast to Y4F, PF is recognized by P14. Binding affinity of the soluble TCR  
721 P14 to each pMHC was measured using SPR.  $K_D$  values are indicated. **C. The p3P modification**  
722 **increases TCR internalization.** TCR downregulation was measured following exposure of P14 T  
723 cells to H-2D<sup>b</sup> in complex with each peptide at indicated concentrations on RMA cells.  
724 CD3<sup>+</sup>CD8<sup>+</sup>CD4<sup>-</sup> and V $\alpha$ 2<sup>+</sup> cells were gated to quantify TCR internalization and p values calculated  
725 by using two-way Anova with Turkey's multiple comparison test. \*\*\*\* represents  $p < 0.0001$ ; \*\*\*  
726 0.0002 and \*\* 0.0018. The H-2D<sup>b</sup>-restricted Influenza-derived peptide ASNENMETM (ASN) was  
727 used as negative control. **D. The p3P modification does not alter the conformation of the**  
728 **backbone of APLs compared to native counterparts.** Superposition of the crystal structures of H-  
729 2D<sup>b</sup>/V3P and H-2D<sup>b</sup>/PF with H-2D<sup>b</sup>/gp33 and H-2D<sup>b</sup>/Y4F, respectively, demonstrates that the p3P  
730 modification does not alter backbone conformations. Significant conformational changes are only  
731 observed for the side chains of peptide residues p1K and p6F following the p3P substitution.

732

733 **Figure 2. The p3P modification increases significantly P14 T cell responses.**

734 **A.** C57/Bl6 mice were adoptively transferred with 10<sup>4</sup> P14 T-cells one day prior to infection with  
735 LCMV. Mice were sacrificed on day 7 post T cell transfer. T-cells from spleen were stained with PE-

736 conjugated H-2D<sup>b</sup>/gp33, H-2D<sup>b</sup>/Y4F or H-2D<sup>b</sup>/PF tetramers. T cells were also stimulated with gp33,  
737 Y4F or PF peptides (10<sup>-6</sup> M) for 5h, prior to assessment of intracellular IFN $\gamma$  and TNF expression  
738 levels. **B.** Gating strategy used to detect CD8<sup>+</sup> CD44<sup>+</sup> cells. P14 T cells were distinguished from  
739 endogenous T-cells using the Ly5.1 (V450) marker. **C.** Representative density plots from tetramer  
740 staining. CD8<sup>+</sup> CD44<sup>+</sup> P14 T-cells were stained with H-2D<sup>b</sup>/gp33 (left), H-2D<sup>b</sup>/Y4F (middle) and H-  
741 2D<sup>b</sup>/PF (right) tetramers. **D.** Representative ICS density plots. P14 T-cells were stimulated with  
742 peptides gp33 (left), Y4F (middle) or PF (right). **E.** CD8<sup>+</sup> CD44<sup>+</sup> P14 T-cells from the spleen were  
743 stained with the indicated tetramers on the x-axis (left). P14 T-cells from the spleen were stimulated  
744 with the peptides indicated on the x-axis, and expression of INF $\gamma$  (middle) and TNF (right) was  
745 assessed. Error bars show mean +/- SD. One-way anova was performed to compare between different  
746 groups. P-values \* and \*\*\* represent p<0.05 and p<0.001, respectively. The analysis was made using  
747 the GraphPad Prism software.

748  
749 **Figure 3. Vaccination of C57/Bl6 mice with influenza virus encoding for PF re-established**  
750 **efficient recognition of the immune escape variant Y4F.**

751 The escape mutant Y4F (KAVFNFATM) and the proline-modified variant PF (KAPPNFATM) were  
752 engineered into the stalk region of neuraminidase of the Influenza A virus strain HKx31 (H3N2), and  
753 used to infect C57BL/6 mice. **A.** C57/Bl6 mice infected with either flu(Y4F) or flu(PF) were  
754 sacrificed day 10 post infection. **B.** CD8<sup>+</sup> CD44<sup>+</sup> cells were stained with combinations of H-2D<sup>b</sup>/gp33,  
755 H-2D<sup>b</sup>/Y4F or H-2D<sup>b</sup>/PF tetramers. Right top panel: Representative density plots of CD8<sup>+</sup> CD44<sup>+</sup> T-  
756 cells from mice infected with flu(Y4F) or flu(PF). Data from pooled 4-5 mice, representative of two  
757 different experiments. **C.** Cells were also stimulated with gp33, Y4F or PF peptides for 5 h, and  
758 intracellular IFN $\gamma$  and TNF expression was determined. (Right bottom panel) CD8<sup>+</sup> CD44<sup>+</sup> T-cells

759 isolated from mice infected with flu(Y4F) or flu(PF) were stimulated with either gp33, Y4F or PF  
760 ( $10^{-6}$  M), and thereafter stained for  $\text{INF}\gamma$  and TNF. Data of  $\text{INF}\gamma$  and TNF secretion from pooled 4-5  
761 mice representative of two different experiments. Error bars show mean  $\pm$  SD. Statistical  
762 significance is presented with the p-value from a two-way Anova with Sidak's multiple comparison  
763 test. \* represents  $p < 0.05$ ; \*\* represents  $p < 0.01$ . The analyses were performed using the GraphPad  
764 Prism software.

765

766 **Figure 4. The p3P modification results in conformational changes of peptide residues p1K and**  
767 **p6F, predisposing pMHCs for optimal binding to P14.**

768 **A.** Comparison of gp33 before binding (in green) and after binding (in white) to P14 reveals major  
769 conformational changes in gp33 following binding to P14. These include a movement of the p2-p4  
770 backbone of gp33 that is pushed down in the cleft combined with a 180 degrees rotation of the  
771 isopropyl moiety in residue p3V. Furthermore, the side chain of peptide residues p1K, P4Y and p6F  
772 all take new conformations following binding to P14. All movements are indicated by blue arrows.

773 **B.** The introduction of p3P in V3P results in optimal positioning of the side chains of residues p1K  
774 and p6F prior to binding to P14 (in orange). The only observed conformational difference was taken  
775 by residue p4Y following V3P binding to P14 (in cyan). **C.** Similarly to V3P, the only conformational  
776 difference observed for PF before (in orange) and after (in violet) binding to P14 is at peptide residue  
777 p4Y. **D.** Peptides gp33 (in white), V3P (in cyan) and PF (in violet) take nearly identical conformations  
778 when bound to P14.

779

780 **Figure 5. The p3P modification affects the conformations of peptide residues p1K and P6F, as**  
781 **well as H-2D<sup>b</sup> residues R62, H155 and E163 facilitating TCR recognition.**



782 **A.** Comparison of H-2D<sup>b</sup>/gp33 before (in green) and after P14 binding (in white) reveals that the  
783 conformation of a very limited amount of pMHC residues is affected (shown as sticks). Following  
784 binding to P14, the side chain of peptide residue p1K moves towards the N-terminal part of the peptide  
785 binding cleft while the side chain of p6F rotates. As a consequence, conformational changes are  
786 observed only for heavy chain residues R62, H155 and E163. **B.** In contrast to gp33, the introduced  
787 p3P modification already positions most peptide and heavy chain residues in optimal conformations,  
788 limiting significantly the required movements following binding to P14. pMHC residues before and  
789 after binding to P14 are colored orange and cyan, respectively. **C.** Similarly to V3P, the p3P  
790 modification in PF results in optimal positioning of all key peptide and heavy chain residues prior to  
791 binding to P14. pMHC residues before and after binding to P14 are colored orange and violet,  
792 respectively.

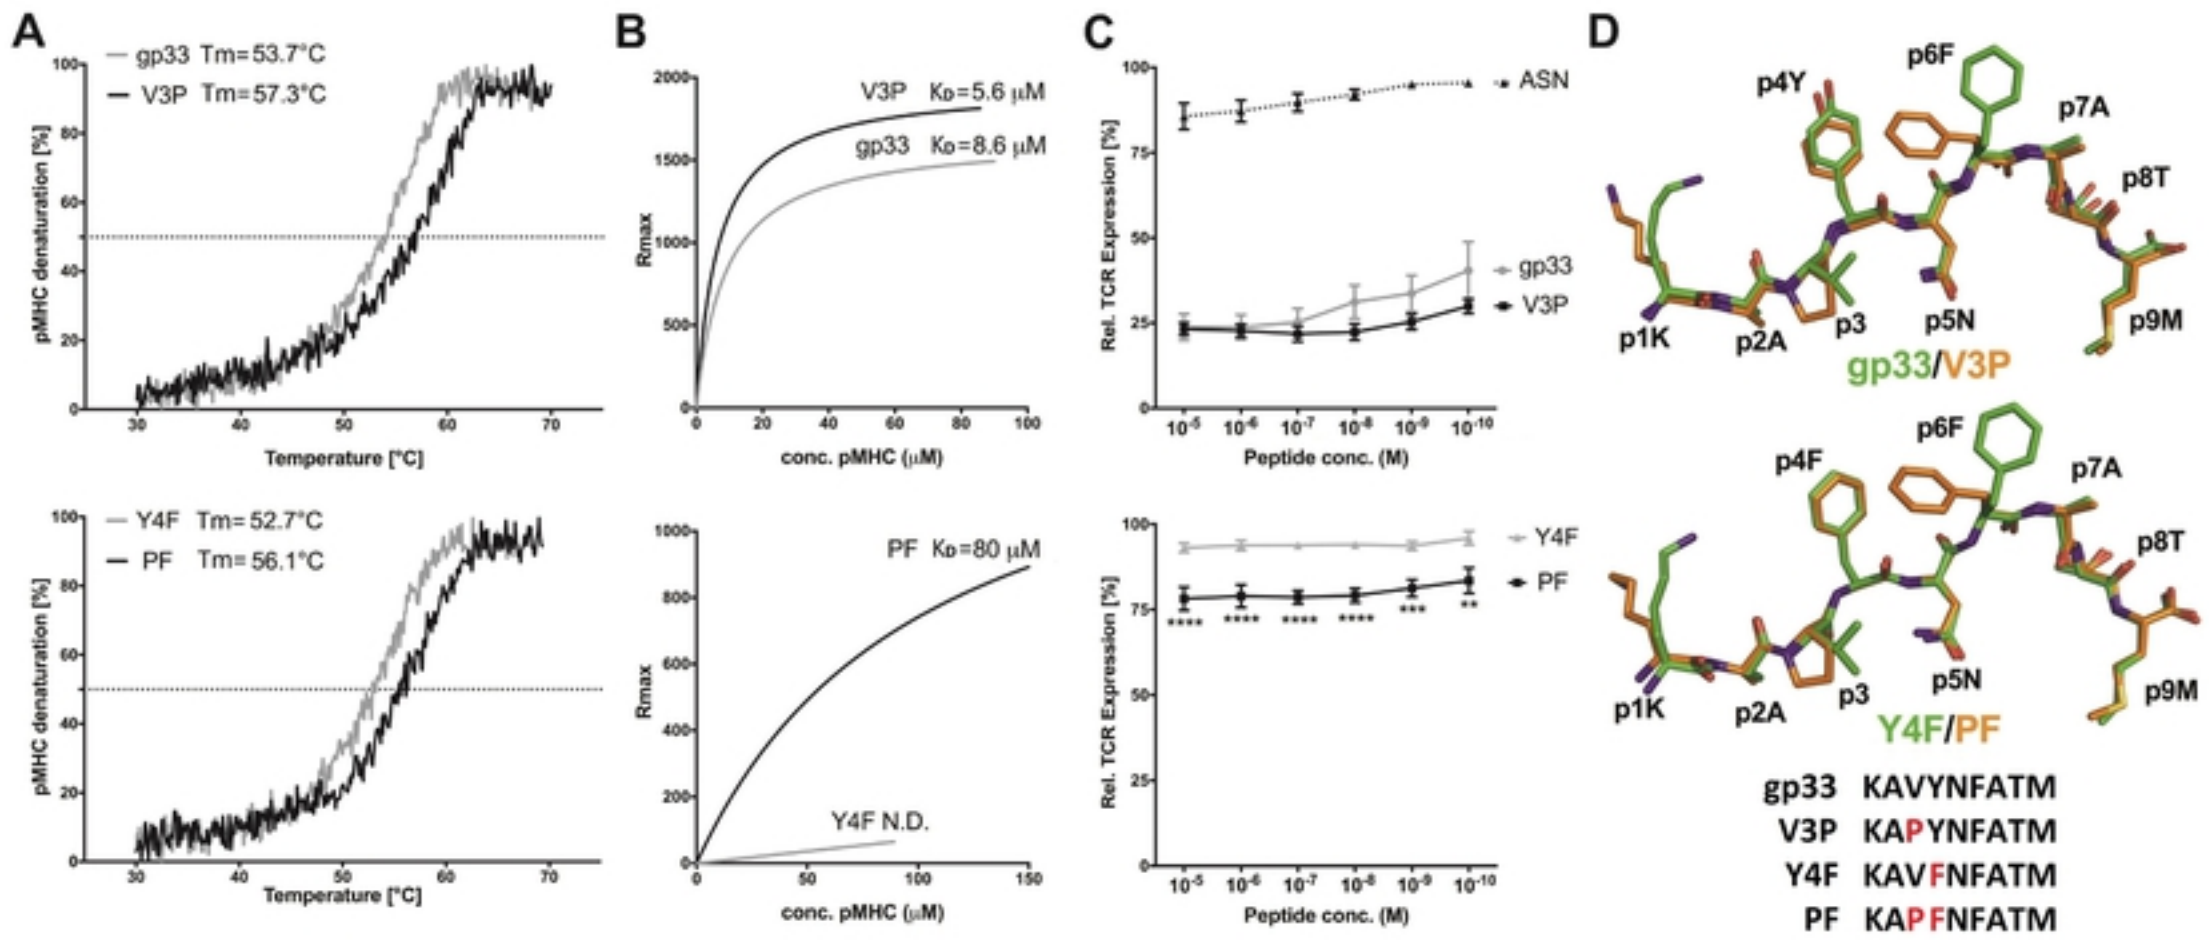

bioRxiv preprint doi: <https://doi.org/10.1101/862144>; this version posted December 2, 2019. The copyright holder for this preprint (which was not certified by peer review) is the author/funder, who has granted bioRxiv a license to display the preprint in perpetuity. It is made available under aCC-BY 4.0 International license.

Figure 1

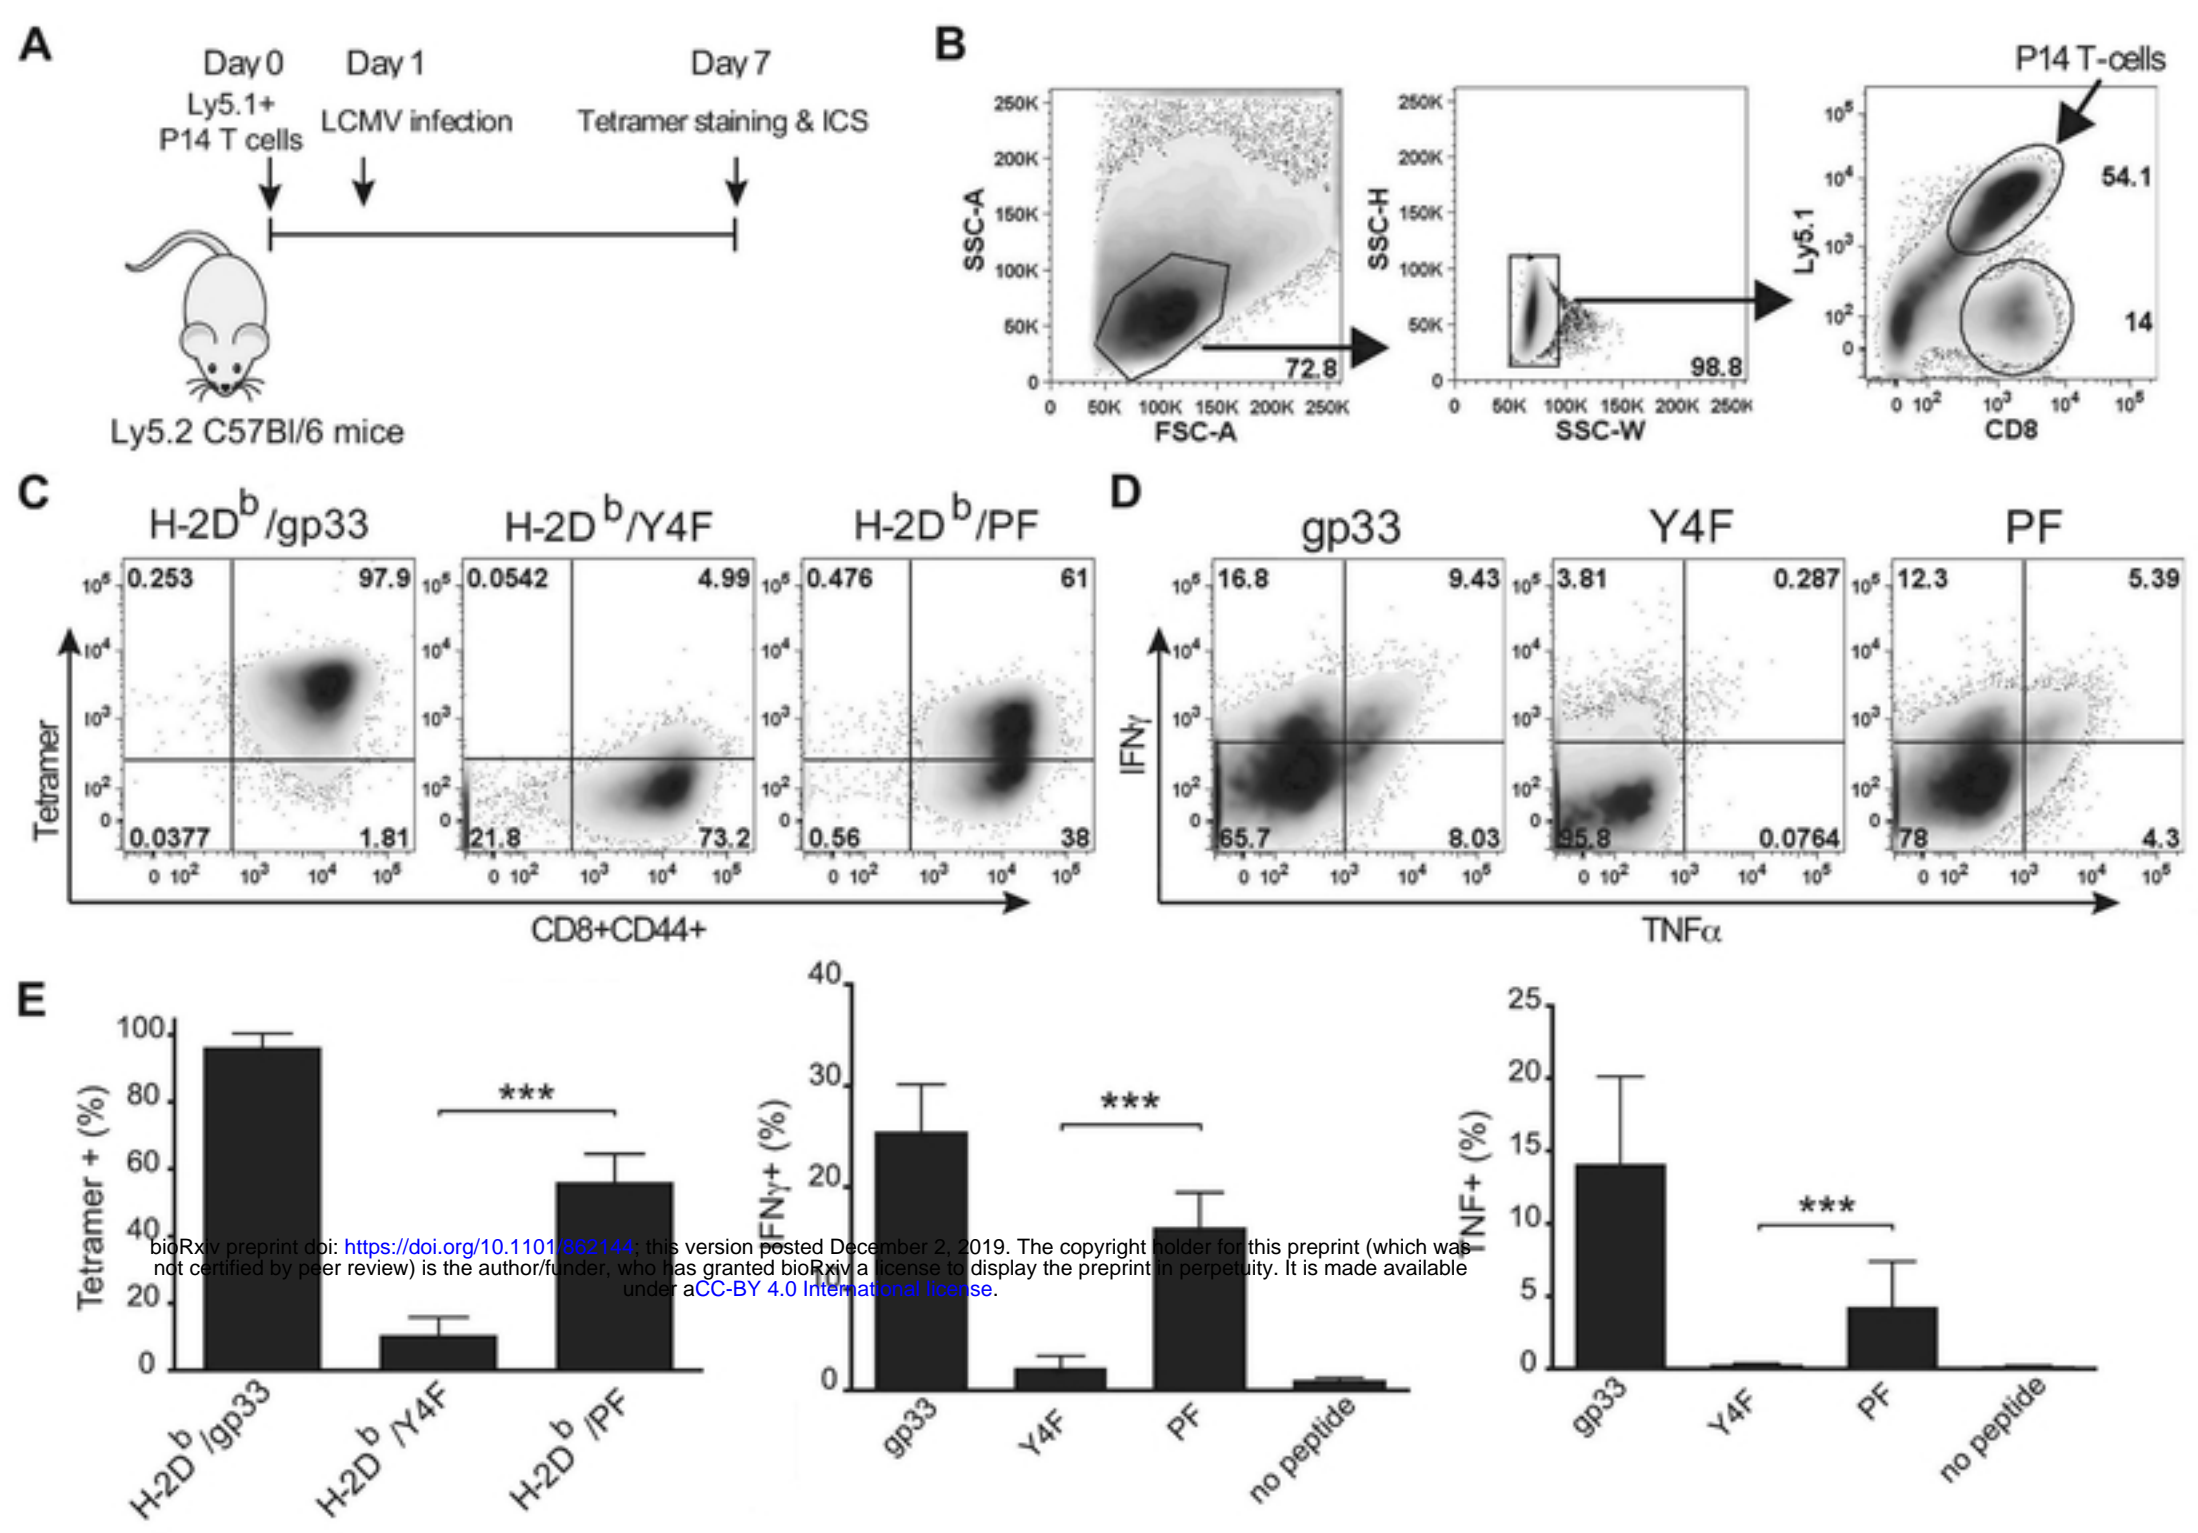

Figure 2

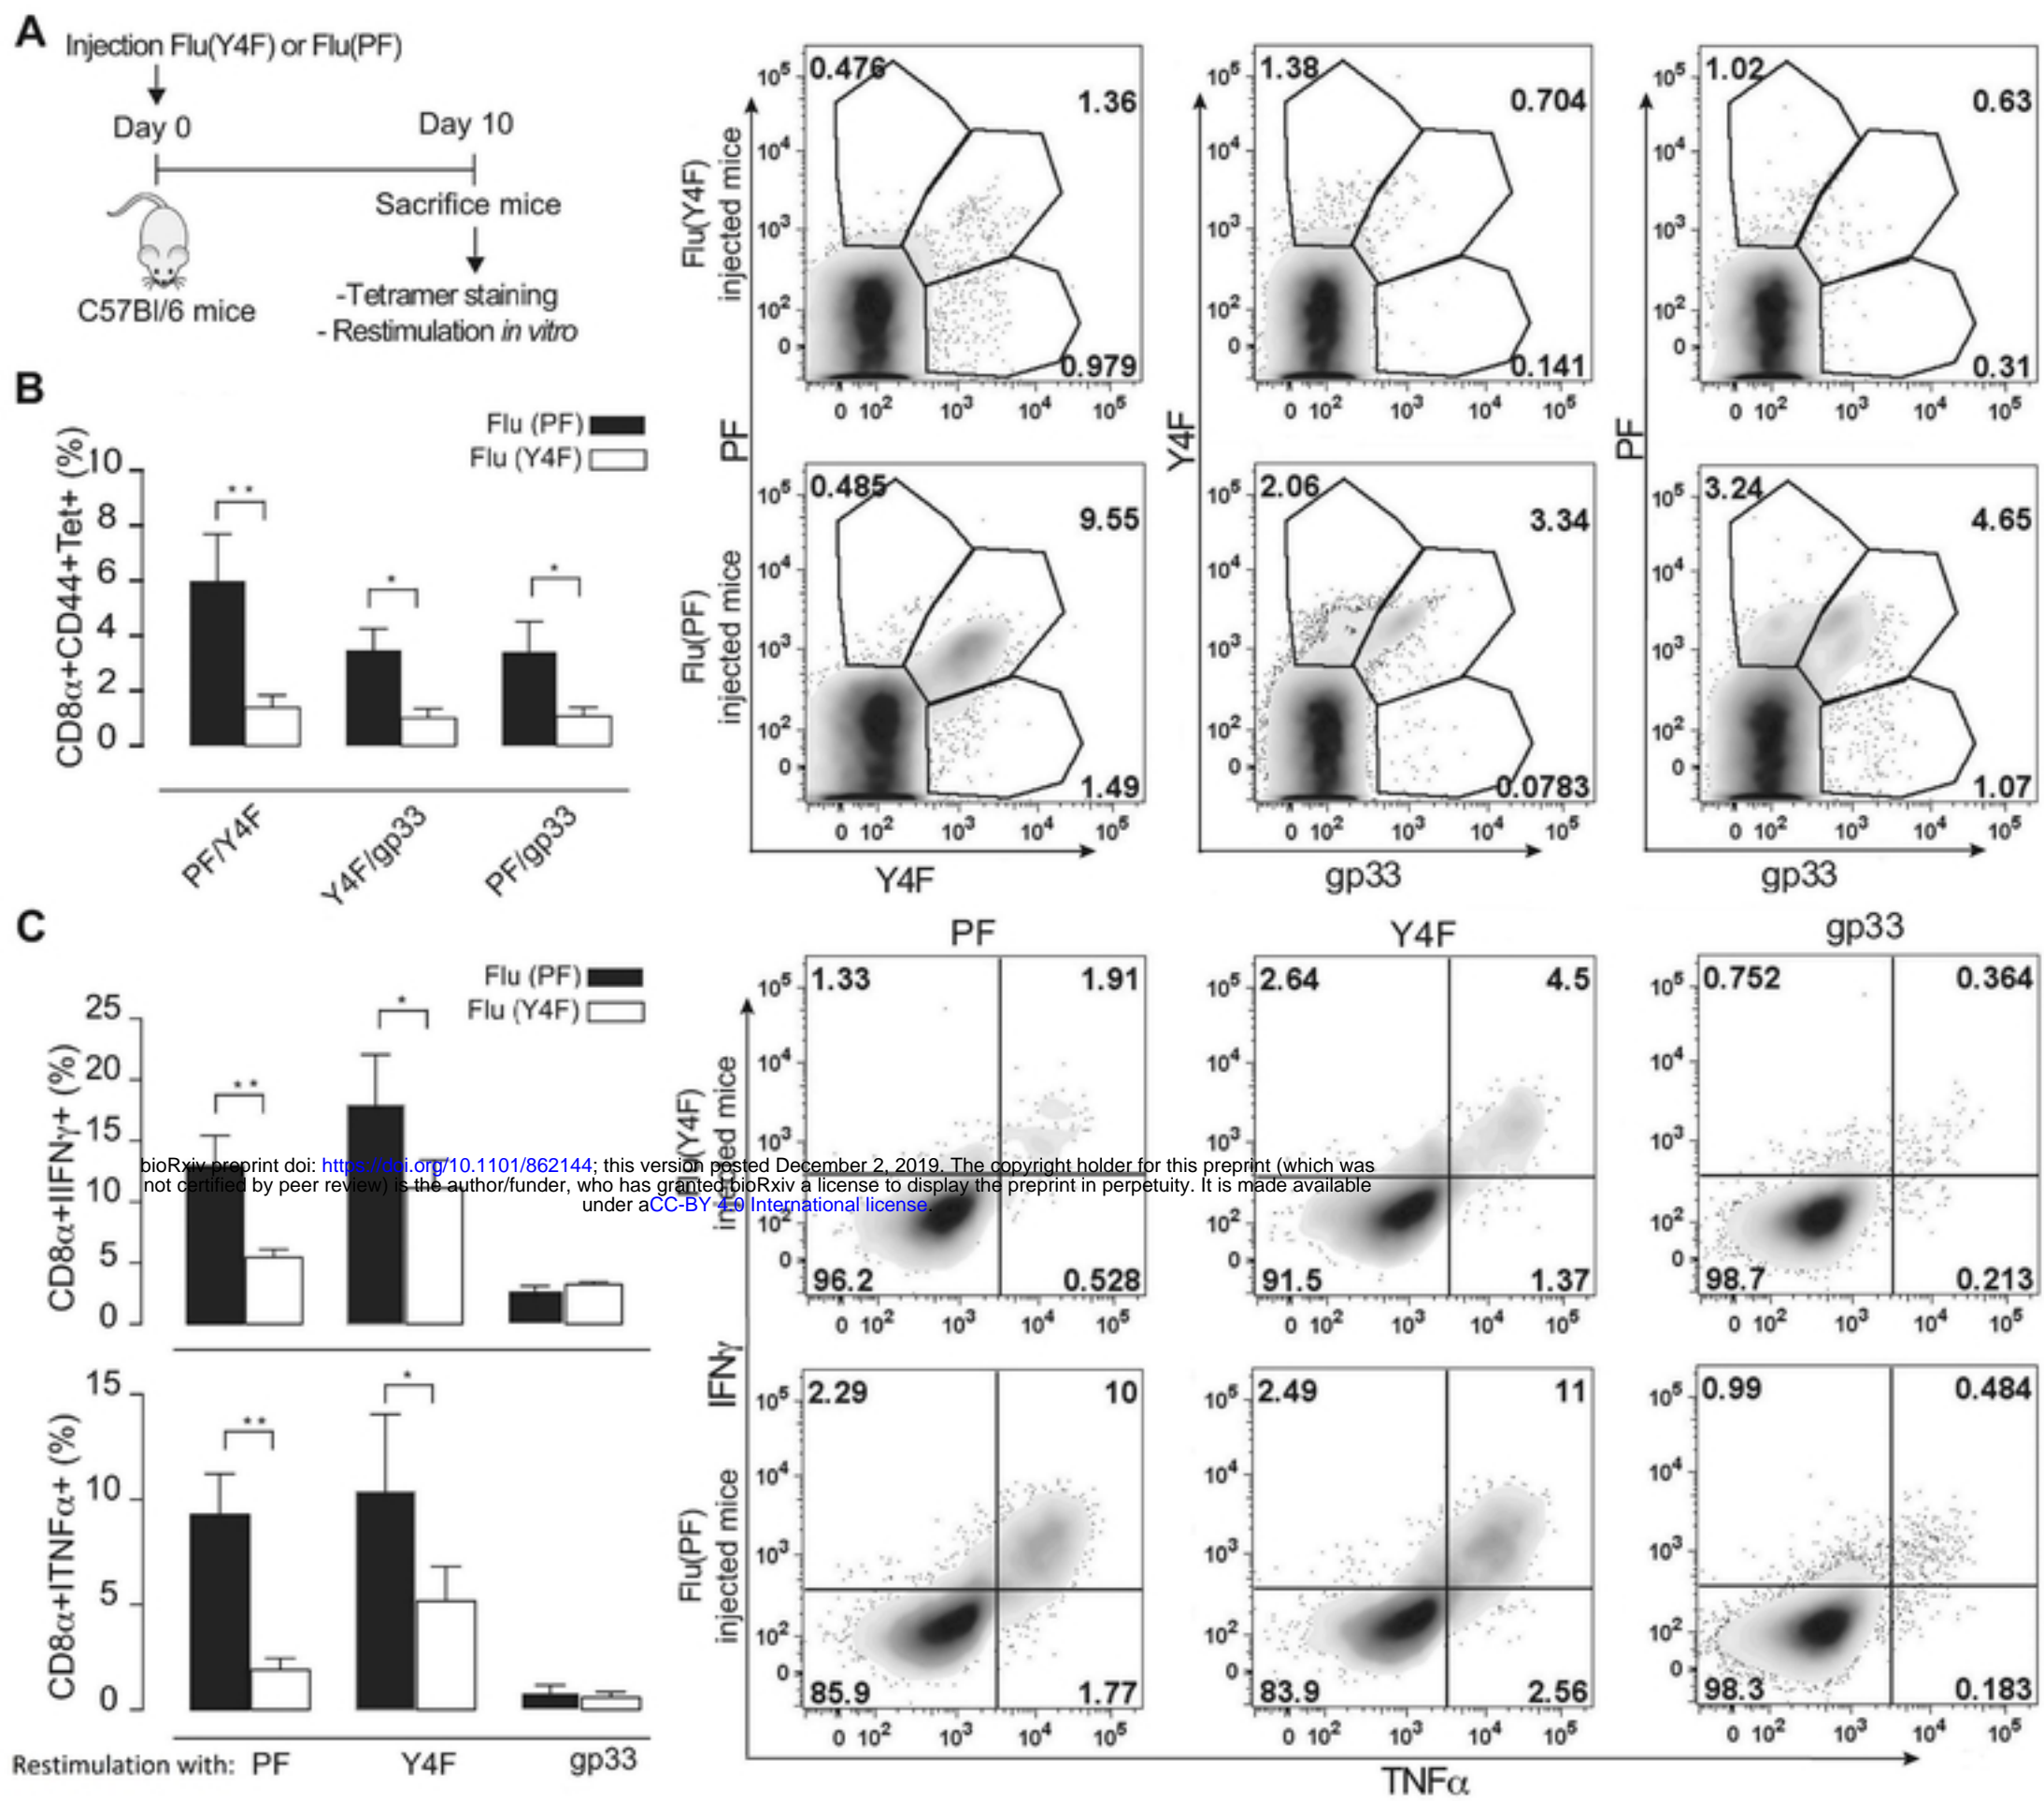

Figure 3

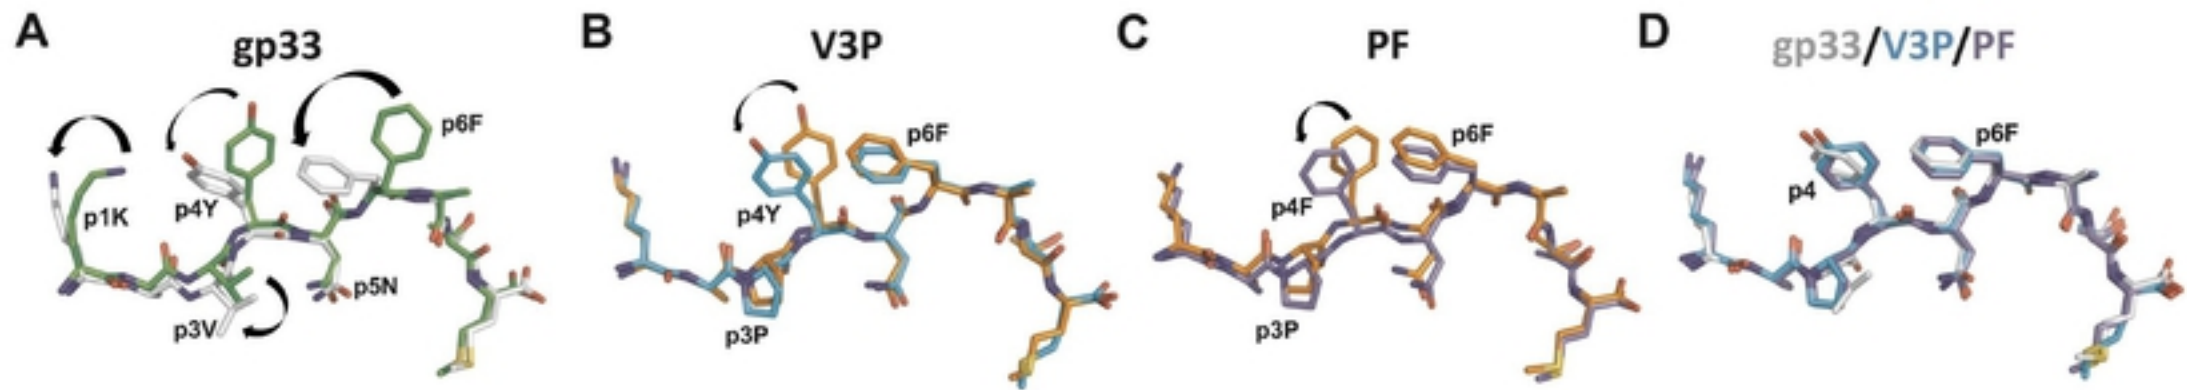

bioRxiv preprint doi: <https://doi.org/10.1101/862144>; this version posted December 2, 2019. The copyright holder for this preprint (which was not certified by peer review) is the author/funder, who has granted bioRxiv a license to display the preprint in perpetuity. It is made available under aCC-BY 4.0 International license.

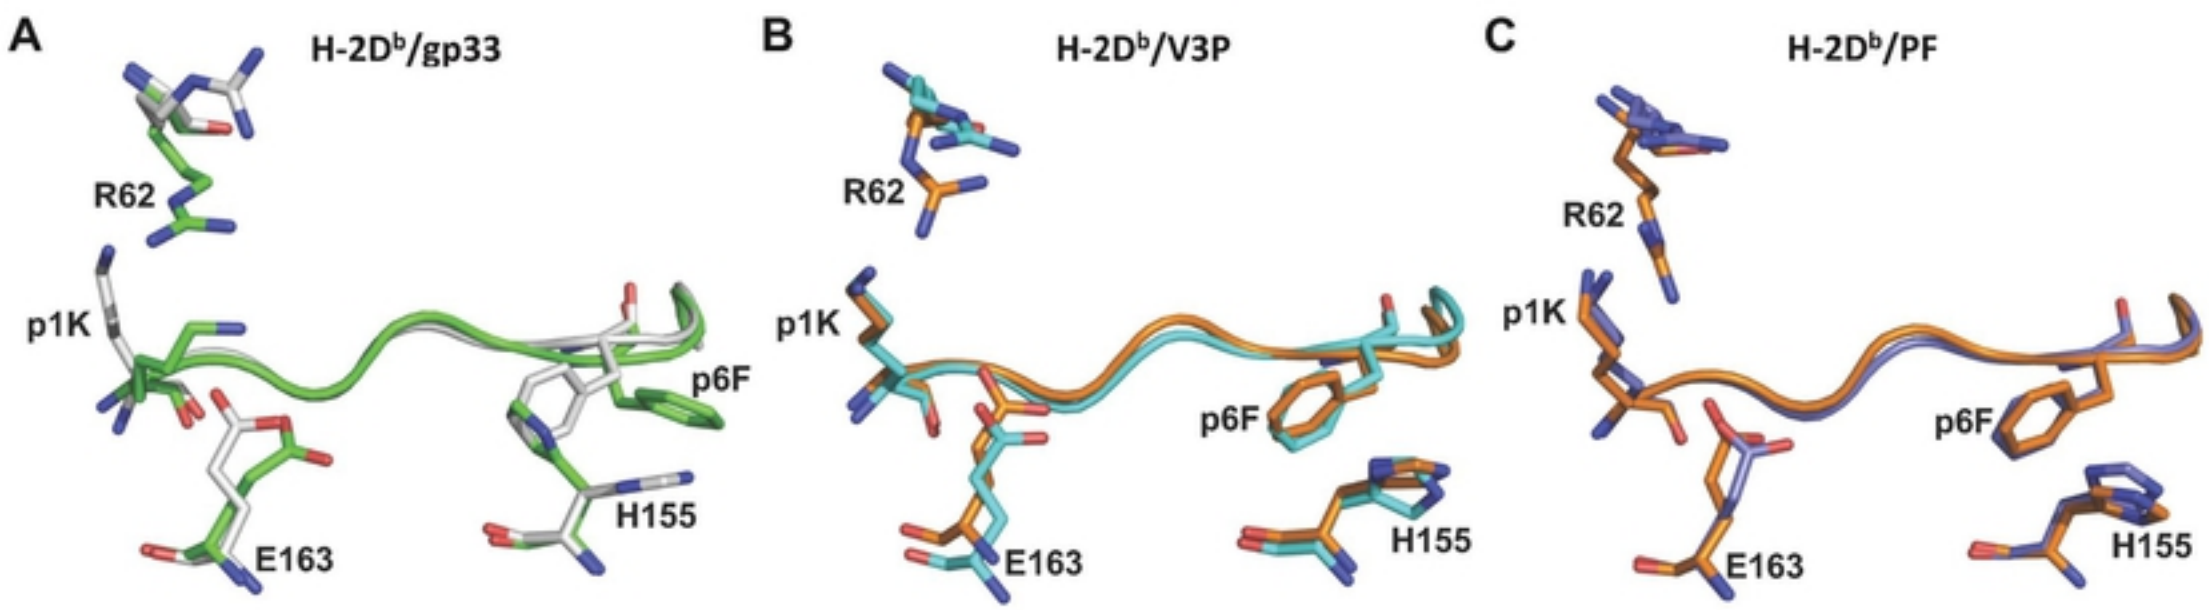

bioRxiv preprint doi: <https://doi.org/10.1101/862144>; this version posted December 2, 2019. The copyright holder for this preprint (which was not certified by peer review) is the author/funder, who has granted bioRxiv a license to display the preprint in perpetuity. It is made available under aCC-BY 4.0 International license.
